# Supplementary material
Source: PubMed Central journal article supplement (PMC8372210)
Supplement: MD-012-D1MD00120E-s001.pdf [file MD-012-D1MD00120E-s001.pdf]

## Metabolically stable Apelin-analogues, incorporating cyclohexylalanine and homoarginine, as potent apelin receptor activators

Kleinberg X. Fernandez<sup>a</sup>, Conrad Fischer<sup>a†</sup>, Jennie Vu<sup>c</sup>, Mahmoud Gheblawi<sup>b,c</sup>, Wang Wang<sup>c,d</sup>, Samantha Gottschalk<sup>a</sup>, Xavier Iturriz<sup>e,f,g,h</sup>, Catherine Llorens-Cortès<sup>e,f,g</sup>, Gavin Y. Oudit<sup>b,c</sup> and John C. Vederas<sup>\*a</sup>

[a] *Department of Chemistry, University of Alberta, 11227 Saskatchewan Drive NW, Edmonton, Alberta, Canada T6G 2G2. \*E-mail: john.vederas@ualberta.ca*

[b] *Mazankowski Alberta Heart Institute, University of Alberta, 8440-112 St. NW, Edmonton, Alberta, Canada T6G 2B7.*

[c] *Department of Physiology, University of Alberta, 8440-112 Street NW, Edmonton, Alberta T6G 2B7, Canada*

[d] *Department of Medicine, University of Alberta, 8440-112 Street NW, Edmonton, Alberta T6G 2B7, Canada*

[e] *Laboratory of Central Neuropeptides in the Regulation of Body Fluid Homeostasis and Cardiovascular Functions, INSERM, U1050, Paris, F-75005, France*

[f] *Center for Interdisciplinary Research in Biology (CIRB), College de France, Paris, F-75005, France*

[g] *CNRS, UMR 7241, Paris, F-75005, France*

[h] *Present address: Université Paris Saclay, CEA, INRAE, Medicines and Technologies for Health Department, SIMoS, Gif-sur-Yvette, 9119, France*

[†] *Present address: Department of Physical Sciences, Barry University, 11300 NE 2nd Ave, Miami Shores FL 33161, USA*

### Table of Contents

| Serial No. | Description                                                                               | Page No. |
|------------|-------------------------------------------------------------------------------------------|----------|
| 1          | Analysis table for all included compounds                                                 | 2        |
| 2          | Experimental procedures for the synthesis of Fmoc-hArg(Boc) <sub>2</sub> -N-Me-<br>Cha-OH | 3-6      |
| 3          | Experimental procedures for the synthesis of Fmoc-hArg(Boc) <sub>2</sub> -N-Me-<br>Leu-OH | 7-8      |
| 4          | <i>In vitro</i> NEP stability of novel analogues                                          | 9        |
| 5          | <i>In vitro</i> human plasma stability of novel 13-mers                                   | 10       |
| 6          | <i>In vitro</i> mice plasma stability of novel 17-mers                                    | 11       |
| 7          | Ca <sup>2+</sup> -mobilization: concentration response curves                             | 12-13    |
| 8          | Blood pressure data for novel 13-mers                                                     | 14       |
| 9          | LCMS/MS analysis for novel analogues                                                      | 15-17    |
| 10         | HPLC trace for novel analogues                                                            | 18-20    |
| 11         | References                                                                                | 21       |

**Analysis table of all included compounds**

|                             | <b>Substitution</b>                                                                     | <b>Molecular<br/>Formula</b>                                        | <b>Purity</b> | <b>Detected<br/>Ion</b> | <b>Theoretical<br/><i>m/z</i></b> | <b>HRMS</b> |
|-----------------------------|-----------------------------------------------------------------------------------------|---------------------------------------------------------------------|---------------|-------------------------|-----------------------------------|-------------|
| <b>Small<br/>Molecules</b>  |                                                                                         |                                                                     |               |                         |                                   |             |
| <b>20</b>                   | (4 <i>S</i> )-3-(9-Fluorenylmethyloxy carbonyl)-4-cyclohexylalanine-5-oxo-oxazolidinone | C <sub>25</sub> H <sub>27</sub> NO <sub>4</sub>                     | Pure          | (M+Na) <sup>+</sup>     | 405.1940                          | 428.1831    |
| <b>21</b>                   | Fmoc- <i>N</i> -Me-Cha-OH                                                               | C <sub>25</sub> H <sub>29</sub> NO <sub>4</sub>                     | Pure          | (M+H) <sup>+</sup>      | 407.2097                          | 408.2165    |
| <b>22</b>                   | Fmoc- <i>N</i> -Me-Cha-OBn                                                              | C <sub>32</sub> H <sub>35</sub> NO <sub>4</sub>                     | Pure          | (M+H) <sup>+</sup>      | 497.2566                          | 498.2646    |
| <b>23</b>                   | Fmoc-Lys(Boc)- <i>N</i> -Me-Cha-OBn                                                     | C <sub>43</sub> H <sub>55</sub> N <sub>3</sub> O <sub>7</sub>       | Pure          | (M+H) <sup>+</sup>      | 725.4055                          | 726.4129    |
| <b>24</b>                   | Fmoc-hArg(Boc) <sub>2</sub> - <i>N</i> -Me-Cha-OBn                                      | C <sub>49</sub> H <sub>65</sub> N <sub>5</sub> O <sub>9</sub>       | Pure          | (M+H) <sup>+</sup>      | 867.4776                          | 868.4849    |
| <b>25</b>                   | Fmoc-hArg(Boc) <sub>2</sub> - <i>N</i> -Me-Cha-OH                                       | C <sub>42</sub> H <sub>59</sub> N <sub>5</sub> O <sub>9</sub>       | Pure          | (M+H) <sup>+</sup>      | 777.4313                          | 778.4376    |
| <b>26</b>                   | Fmoc-Lys(Boc)- <i>N</i> -Me-Leu-OBn                                                     | C <sub>40</sub> H <sub>51</sub> N <sub>3</sub> O <sub>7</sub>       | Pure          | (M+H) <sup>+</sup>      | 685.3727                          | 683.3791    |
| <b>27</b>                   | Fmoc-hArg(Boc) <sub>2</sub> - <i>N</i> -Me-Leu-OBn                                      | C <sub>46</sub> H <sub>61</sub> N <sub>5</sub> O <sub>9</sub>       | Pure          | (M+H) <sup>+</sup>      | 827.4469                          | 828.4535    |
| <b>28</b>                   | Fmoc-hArg(Boc) <sub>2</sub> - <i>N</i> -Me-Leu-OH                                       | C <sub>39</sub> H <sub>55</sub> N <sub>5</sub> O <sub>9</sub>       | Pure          | (M+H) <sup>+</sup>      | 737.4000                          | 738.4062    |
|                             |                                                                                         |                                                                     |               |                         |                                   |             |
| <b>Apelin<br/>analogues</b> |                                                                                         |                                                                     |               |                         |                                   |             |
| <b>1</b>                    | Apelin13A2                                                                              | C <sub>69</sub> H <sub>109</sub> BrN <sub>22</sub> O <sub>16</sub>  | 98.5 %        | -                       | -                                 | -           |
| <b>2</b>                    | NMeLeu13A2                                                                              | C <sub>70</sub> H <sub>111</sub> BrN <sub>22</sub> O <sub>16</sub>  | 96.3 %        | -                       | -                                 | -           |
| <b>3</b>                    | hArg13A2                                                                                | C <sub>70</sub> H <sub>111</sub> BrN <sub>22</sub> O <sub>16</sub>  | 96.8 %        | (M+2H) <sup>2+</sup>    | 811.4017                          | 811.4019    |
| <b>4</b>                    | Cha13A2                                                                                 | C <sub>72</sub> H <sub>113</sub> BrN <sub>22</sub> O <sub>16</sub>  | 98.2 %        | (M+2H) <sup>2+</sup>    | 798.3939                          | 798.3916    |
| <b>5</b>                    | hArgCha13A2                                                                             | C <sub>73</sub> H <sub>115</sub> BrN <sub>22</sub> O <sub>16</sub>  | 98.4 %        | (M+2H) <sup>2+</sup>    | 818.4095                          | 818.4074    |
| <b>6</b>                    | Apelin17A2                                                                              | C <sub>96</sub> H <sub>157</sub> BrN <sub>34</sub> O <sub>20</sub>  | 97.5 %        | -                       | -                                 | -           |
| <b>7</b>                    | NMeLeu17A2                                                                              | C <sub>97</sub> H <sub>159</sub> BrN <sub>34</sub> O <sub>20</sub>  | 97.0 %        | -                       | -                                 | -           |
| <b>8</b>                    | hArg17A2                                                                                | C <sub>97</sub> H <sub>159</sub> BrN <sub>34</sub> O <sub>20</sub>  | 96.8 %        | (M+3H) <sup>3+</sup>    | 742.7343                          | 742.7329    |
| <b>9</b>                    | Cha17A2                                                                                 | C <sub>99</sub> H <sub>161</sub> BrN <sub>34</sub> O <sub>20</sub>  | 98.8 %        | (M+3H) <sup>3+</sup>    | 734.0624                          | 734.0605    |
| <b>10</b>                   | hArgCha17A2                                                                             | C <sub>100</sub> H <sub>163</sub> BrN <sub>34</sub> O <sub>20</sub> | 97.0 %        | (M+3H) <sup>3+</sup>    | 747.4062                          | 747.4050    |
| <b>11</b>                   | NMeCha17A2                                                                              | C <sub>100</sub> H <sub>163</sub> BrN <sub>34</sub> O <sub>20</sub> | 96.8 %        | (M+3H) <sup>3+</sup>    | 747.4076                          | 747.4062    |
| <b>12</b>                   | hArgNMeCha17A2                                                                          | C <sub>101</sub> H <sub>165</sub> BrN <sub>34</sub> O <sub>20</sub> | 95.2 %        | (M+4H) <sup>4+</sup>    | 564.3025                          | 564.3103    |
| <b>13</b>                   | hArgNMeLeu17A2                                                                          | C <sub>98</sub> H <sub>161</sub> BrN <sub>34</sub> O <sub>20</sub>  | 98.4 %        | (M+4H) <sup>4+</sup>    | 555.3025                          | 554.2950    |

**1. Experimental procedures for the synthesis of Fmoc-hArg(diBoc)-N-Me-Cha-OH****20. (4S)-3-(9-Fluorenylmethyloxycarbonyl)-4-cyclohexylalanine-5-oxo-oxazolidinone**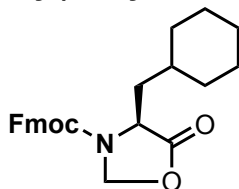

This reaction was adapted from a literature procedure.<sup>[1]</sup> Fmoc-L-Cha-OH (2.00 g, 5.08 mmol) was suspended in 100 mL of toluene and paraformaldehyde (1.06 g, 33.8 mmol) and *p*-toluenesulfonic acid (0.12 g, 0.55 mmol) were subsequently added. The mixture was refluxed at 120 °C for 2 h with azeotropic water removal, giving a pale-white solution. The solution was cooled to room temperature and subsequently washed with 1M NaHCO<sub>3</sub> (3 x 50 mL) and brine (3 x 50 mL). The organic layer was dried over Na<sub>2</sub>SO<sub>4</sub> and concentrated *in vacuo*. The product was purified by flash chromatography (silica gel, 25% EtOAc in hexanes), yielding **20** as a white solid (1.90 g, 95%). (*R*<sub>f</sub> = 0.29 on SiO<sub>2</sub>, 25% EtOAc in hexanes); [α]<sub>D</sub><sup>26</sup> 63.36 (*c* 0.65 CH<sub>2</sub>Cl<sub>2</sub>); IR (CH<sub>2</sub>Cl<sub>2</sub> cast) 3067, 3041, 3019, 2924, 2851, 1801, 1716, 1478, 1450, 1417, 1056 cm<sup>-1</sup>; <sup>1</sup>H (CDCl<sub>3</sub>, 400 MHz) δ 7.78 (dd, *J* = 3.3 Hz, 2H, Fmoc Ar-H), 7.54 (d, *J* = 7.3 Hz, 2H, Fmoc Ar-H), 7.42 (dt, *J* = 7.5 Hz, 2H, Ar-H), 7.33 (dt, 7.39 Hz, 2H, Fmoc Ar-H), 5.34 (app. s, 1H, Fmoc-CH), 5.07 (d, *J* = 4.61 Hz, 2H, Fmoc-CH<sub>2</sub>), 4.68 (app. s, 2H, oxazolidinone CH<sub>2</sub>), 4.23, (t, *J* = 4.74, 1H, Cha-CH<sub>α</sub>), 1.80 – 1.60 (app. s, 6H, Cha-CH<sub>2</sub>), 1.45 – 1.35 (app. s, 2H, Cha-CH<sub>2</sub>β), 1.25 – 1.15 (app. s, 4H, Cha-CH<sub>2</sub>), 1.00 – 0.60 (app. s, 1H, Cha-CH<sub>γ</sub>); <sup>13</sup>C (CDCl<sub>3</sub>, 100 MHz) δ 172.5, 141.5, 128.0, 127.3, 127.2, 124.6, 120.2, 65.9, 52.9, 47.3, 37.8, 33.2, 26.3, 26.1, 26.0, 15.3; HRMS (ESI) Calculated for C<sub>25</sub>H<sub>27</sub>NO<sub>4</sub> 405.1940, found 428.1831 (M+Na)<sup>+</sup>.

**21. Fmoc-N-Me-Cha-OH**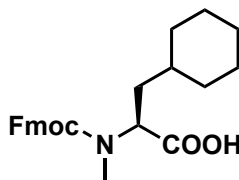

This reaction was adapted from a literature procedure.<sup>[1]</sup> The oxazolidinone intermediate **20** (1.90 g, 4.67 mmol) was dissolved in CHCl<sub>3</sub> and trifluoroacetic acid (30 mL) and triethylsilane (2.35 mL, 14.67 mmol) were added. The solution was stirred at room temperature for 22 h followed by concentration *in vacuo*, affording a sticky yellow solid. The product was purified by flash chromatography (silica gel, 5% MeOH in CH<sub>2</sub>Cl<sub>2</sub>), yielding **21** as an off-white solid (1.50 g, 80%). (*R*<sub>f</sub> = 0.54 on SiO<sub>2</sub>, 5% MeOH in CH<sub>2</sub>Cl<sub>2</sub>); [α]<sub>D</sub><sup>26</sup> -22.05 (*c* 1.16 CH<sub>2</sub>Cl<sub>2</sub>); IR (CH<sub>2</sub>Cl<sub>2</sub> cast) 3067, 3043, 3019, 2924, 2851, 1742, 1706, 1478, 1451 cm<sup>-1</sup>; <sup>1</sup>H (CDCl<sub>3</sub>, 400 MHz) δ 8.68 (bs, 1H, COOH), 7.75 (d, *J* = 7.6 Hz, 2H, Fmoc Ar-H), 7.65 – 7.52 (t, *J* = 6.6 Hz, 2H, Fmoc Ar-H), 7.39 (dt, *J* = 7.4 Hz, 2H, Fmoc Ar-H), 7.37 – 7.27 (dt, 6.89 Hz, 2H, Fmoc Ar-H), 5.01 – 4.50 (d, 4.8 Hz, 2H, Fmoc-CH<sub>2</sub>), 4.46 (t, *J* = 7.6 Hz, Cha-CH<sub>α</sub>), 4.34 – 4.19 (t, *J* = 7.0 Hz, 2H, Fmoc-CH), 2.88 (s, 3H, N-CH<sub>3</sub>), 1.92-1.48 (m, 6H, Cha-CH<sub>2</sub>), 1.34 – 1.08 (m, 4H, Cha-CH<sub>2</sub>), 1.05 – 0.91 (m, 2H, Cha-CH<sub>2</sub>β), 0.83 – 0.71 (m, 1H, Cha-CH<sub>γ</sub>); <sup>13</sup>C (CDCl<sub>3</sub>, 100 MHz) δ 177.7, 157.2, 144.0, 141.4, 127.7, 127.1, 125.1, 124.8, 120.0, 67.9, 56.1, 47.3, 36.0, 33.9, 31.9, 31.8, 30.5, 26.4, 26.3, 26.0; HRMS (ESI) Calculated for C<sub>25</sub>H<sub>29</sub>NO<sub>4</sub> 407.2097, found 408.2165 (M+H)<sup>+</sup>.

## 22. Fmoc-N-Me-Cha-OBn

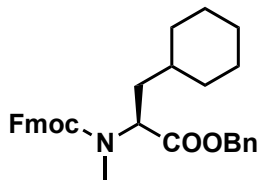

This reaction was adapted from a literature procedure.<sup>2</sup> A solution of **21** (1.50 g, 3.68 mmol) in DMF (100 mL) was cooled to 0 °C. K<sub>2</sub>CO<sub>3</sub> (0.67 g, 4.86 mmol) was added and the reaction mixture was stirred at 0 °C for 1 h. Subsequently, benzyl bromide (0.58 mL, 4.86 mmol) was added and the reaction was stirred at 0 °C for 30 min and then reacted at room temperature overnight to afford an off-white solution. The solution was poured into H<sub>2</sub>O (200 mL) and extracted with hexane (4 x 200 mL). The organic layers were combined and washed with cold H<sub>2</sub>O (2 x 200 mL) and brine (2 x 200 mL), then dried over Na<sub>2</sub>SO<sub>4</sub> and concentrated *in vacuo* to afford a yellow oil. The product was purified by flash chromatography (silica gel, 6:1 hexane:EtOAc), yielding **22** as white crystals (1.33 g, 89%). (R<sub>f</sub> = 0.41 on SiO<sub>2</sub>, 6:1 hexane:EtOAc); [α]<sub>D</sub><sup>26</sup> -13.47 (c 1.24 CH<sub>2</sub>Cl<sub>2</sub>); IR (CH<sub>2</sub>Cl<sub>2</sub> cast) 3089, 3066, 3037, 2924, 2851, 1740, 1703, 1149 cm<sup>-1</sup>; <sup>1</sup>H (CDCl<sub>3</sub>, 400 MHz) δ 7.80 – 7.58 (d, J = 7.5 Hz, 2H, Fmoc Ar-H), 7.76 – 7.49 (t, J = 6.8 Hz, 2H, Fmoc Ar-H), 7.43 – 7.34 (dt, J = 7.4 Hz, 2H, Fmoc Ar-H), 7.33 – 7.27 (m, 2H, Fmoc Ar-H), 7.33 – 7.27 (m, 5H, Ar-H), 5.15 (s, 2H, Ar-CH<sub>2</sub>), 5.03 – 4.57 (d, 4.9 Hz, 2H, Fmoc-CH<sub>2</sub>), 4.41 (t, J = 7.3 Hz, Cha-CH<sub>α</sub>), 4.28 (t, J = 7.1 Hz, 1H, Fmoc-CH), 2.86 (s, 3H, N-CH<sub>3</sub>), 1.74 – 1.60 (m, 6H, Cha-CH<sub>2</sub>), 1.29 – 1.17 (m, 4H, Cha-CH<sub>2</sub>), 1.17 – 1.08 (m, 2H, Cha-CH<sub>2</sub>β), 0.98 – 0.89 (m, 1H, Cha-CH<sub>γ</sub>); <sup>13</sup>C (CDCl<sub>3</sub>, 100 MHz) δ 156.5, 143.6, 140.9, 135.3, 128.2, 127.9, 127.8, 127.7, 127.3, 126.6, 124.6, 123.4, 119.6, 67.2, 66.4, 55.6, 46.9, 35.9, 35.7, 33.5, 31.6, 29.8, 26.0, 25.9, 25.6; HRMS (ESI) Calculated for C<sub>32</sub>H<sub>35</sub>NO<sub>4</sub> 497.2566, found 498.2646 (M+H)<sup>+</sup>.

## 23. Fmoc-Lys(Boc)-N-Me-Cha-OBn

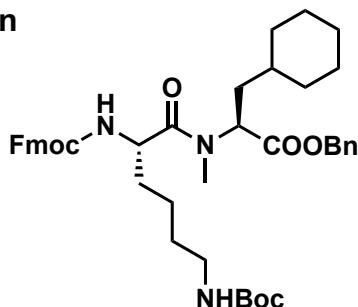

This reaction was adapted from a literature procedure.<sup>[3]</sup> **22** (0.67 g, 1.35 mmol) was dissolved in a 1:1 solution of DEA:DCM (2 mL) and stirred at room temperature for 1 h. The reaction mixture was concentrated under reduced pressure affording a sticky yellow oil. The free amine was used as the crude for the next step. Fmoc-L-Lys(Boc)-OH (1.71 g, 3.65 mmol), PYBOP (1.39 g, 2.67 mmol), HOBt (0.36 g, 2.67 mmol) and DIPEA (3.5 mL, 15.55 mmol) were dissolved in DMF (20 mL) and allowed to pre-activate for 10 min. The free amine was dissolved in dry CH<sub>2</sub>Cl<sub>2</sub> (30 mL) and DIPEA (0.47 mL, 2.67 mmol) was added to it, where the solution was then added to the previous step. The reaction was stirred at room temperature for 22 h. Subsequently, the reaction was washed with saturated NaHCO<sub>3</sub> (50 mL) and EtOAc was added to dissolve the resulting precipitate (50 mL). The organic layer was washed with 10% citric acid (50 mL), cold H<sub>2</sub>O (50 mL) and brine (50 mL), then dried over Na<sub>2</sub>SO<sub>4</sub> and concentrated under reduced pressure to give a sticky yellow oil. The product was purified by flash chromatography (silica gel, 33% EtOAc in hexane), yielding **23** as a white powder (0.43 g, 64%). (R<sub>f</sub> = 0.43 on SiO<sub>2</sub>, 33% EtOAc in hexane);

$[\alpha]_{\text{D}}^{26}$  -15.59 (c 0.88 CH<sub>2</sub>Cl<sub>2</sub>); IR (CH<sub>2</sub>Cl<sub>2</sub> cast) 3333, 3289, 3066, 3043 2854, 2979, 2928, 1721, 1640, 1619, 1499 cm<sup>-1</sup>; <sup>1</sup>H (CDCl<sub>3</sub>, 400 MHz)  $\delta$  7.76 (d, J = 7.4 Hz, 2H, Fmoc Ar-H), 7.59 (dd, J = 7.2, 4.0 Hz, 2H, Fmoc Ar-H), 7.40 – 7.37 (m, 2H, Fmoc Ar-H), 7.36 – 7.28 (m, 2H, Fmoc Ar-H), 7.36 – 7.28 (m, 5H, Ar-H), 5.68 – 4.59 (d, 8.4 Hz, 2H, Ar-CH<sub>2</sub>), 5.39 (dd, 10.8, 5.0 Hz, 1H, Lys-CH $\alpha$ ), 5.13 (dd, J = 12.2, 10.8 Hz, Cha-CH $\alpha$ ), 4.36 (d, J = 7.0 Hz, 2H, Fmoc-CH<sub>2</sub>), 4.22 (t, 7.1 Hz, 1H, Fmoc-CH), 3.07 (m, 2H, Lys-CH<sub>2</sub> $\epsilon$ ), 2.94 (s, 3H, N-CH<sub>3</sub>), 1.88-1.74 (m, 2H, Lys-CH<sub>2</sub> $\beta$ ), 1.73 – 1.56 (m, 2H, Lys-CH<sub>2</sub> $\delta$ ), 1.73 – 1.56 (m, 6H, Cha-CH<sub>2</sub>), 1.43 (s, 9H, Boc-(CH<sub>3</sub>)<sub>3</sub>), 1.37 (m, 2H, Lys-CH<sub>2</sub> $\gamma$ ), 1.18 – 1.07 (m, 1H, Cha-CH $\gamma$ ), 1.18 – 1.07 (m, 4H, Cha-CH<sub>2</sub>), 1.04 – 0.78 (q, 10.4 Hz, 1H, Cha-CH<sub>2</sub> $\beta$ ), 1.04 – 0.78 (q, 11.4 Hz, 1H, Cha-CH<sub>2</sub> $\beta$ ); <sup>13</sup>C (CDCl<sub>3</sub>, 100 MHz)  $\delta$  172.3, 171.2, 155.6, 143.4, 140.9, 135.4, 128.2, 128.1, 127.9, 127.3, 126.7, 124.7, 119.6, 109.6, 66.7, 53.7, 50.5, 46.8, 43.0, 35.1, 33.8, 33.7, 32.0, 31.7, 30.7, 28.8, 28.1, 26.0, 25.8, 25.6, 21.8; HRMS (ESI) Calculated for C<sub>43</sub>H<sub>55</sub>N<sub>3</sub>O<sub>7</sub> 725.4055, found 726.4129 (M+H)<sup>+</sup>.

#### 24. Fmoc-hArg(Boc)<sub>2</sub>-N-Me-Cha-OBn

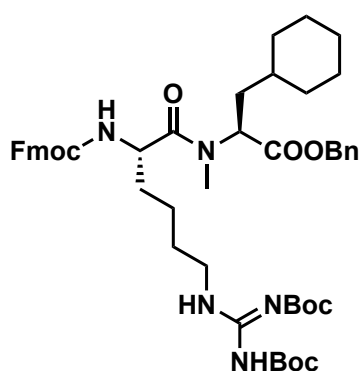

This reaction was adapted from a literature procedure.<sup>[3]</sup> Dipeptide **23** (0.43 g, 0.59 mmol) was dissolved in dry CH<sub>2</sub>Cl<sub>2</sub> (20 mL) and TFA (10 mL) was added to the solution. The reaction was stirred at room temperature for 1.5 h and concentrated *in vacuo* giving a sticky yellow foam. The foam was resuspended in dry CH<sub>2</sub>Cl<sub>2</sub> (20 mL) with the addition of N,N'-Di-Boc-N''-guanidine triflate (0.254 g, 0.65 mmol) and Et<sub>3</sub>N (0.18 mL, 1.3 mmol) and stirred at room temperature for 1.5 h. The reaction was washed with 2M NaHSO<sub>4</sub> (20 mL), 10% NaHCO<sub>3</sub> (20 mL) and brine (20 mL), then dried over Na<sub>2</sub>SO<sub>4</sub> and concentrated *in vacuo* to give an off-white foam. The product was purified by flash chromatography (silica gel, 33% EtOAc in hexane), yielding **24** as a white powder (0.28 g, 65%). (R<sub>f</sub> = 0.57 on SiO<sub>2</sub>, 33% EtOAc in hexane);  $[\alpha]_{\text{D}}^{26}$  -12.70 (c 0.63 CH<sub>2</sub>Cl<sub>2</sub>); IR (CH<sub>2</sub>Cl<sub>2</sub> cast) 3333, 3066, 2978, 2929, 2854, 1721, 1640, 1134 cm<sup>-1</sup>; <sup>1</sup>H (CDCl<sub>3</sub>, 400 MHz)  $\delta$  7.76 (d, J = 7.4 Hz, 2H, Fmoc Ar-H), 7.59 (dd, J = 7.2, 4.0 Hz, 2H, Fmoc Ar-H), 7.43 – 7.35 (m, 2H, Fmoc Ar-H), 7.35 – 7.25 (m, 2H, Fmoc Ar-H), 7.35 – 7.25 (m, 5H, Ar-H), 5.60 (d, J = 8.2 Hz, 1H, Cha-CH $\alpha$ ), 5.38 (dd, J = 10.6, 5.0 Hz, 1H, Lys-CH $\alpha$ ), 5.10 (dd, J = 12.7, 12.0 Hz, Ar-CH<sub>2</sub>), 4.64 (app. s, 1H, Lys-NH $\alpha$ ), 4.35 (m, 2H, Fmoc-CH<sub>2</sub>), 4.19 (t, J = 7.0 Hz, 1H, Fmoc-CH), 3.37 (m, 2H, Lys-CH<sub>2</sub> $\epsilon$ ), 2.92 (s, 3H, N-CH<sub>3</sub>), 1.90 – 1.74 (m, 2H, Lys-CH<sub>2</sub> $\beta$ ), 1.74 – 1.55 (m, 6H, Cha-CH<sub>2</sub>), 1.74 – 1.55 (m, 2H, Lys-CH<sub>2</sub> $\delta$ ), 1.50 (s, 9H, Boc-(CH<sub>3</sub>)<sub>3</sub>), 1.47 (s, 9H, Boc-(CH<sub>3</sub>)<sub>3</sub>), 1.37 (m, 2H, Lys-CH<sub>2</sub> $\gamma$ ), 1.26 – 1.07 (m, 4H, Cha-CH<sub>2</sub>), 1.26 – 1.07 (m, 1H, Cha-CH), 0.97 (q, J = 10.4 Hz, 1H, Cha-CH<sub>2</sub> $\beta$ ), 0.85 (q, J = 16.4 Hz, 1H, Cha-CH<sub>2</sub> $\beta$ ); <sup>13</sup>C (CDCl<sub>3</sub>, 100 MHz)  $\delta$  172.7, 171.4, 156.1, 143.9, 143.8, 141.3, 135.4, 128.6, 128.5, 128.4, 127.7, 127.1, 125.2, 120.0, 67.1, 54.1, 50.1, 47.2, 35.5, 34.1, 33.8, 32.4, 32.1, 28.3, 28.1, 26.4, 26.2, 25.4, 22.4; HRMS (ESI) Calculated for C<sub>49</sub>H<sub>65</sub>N<sub>5</sub>O<sub>9</sub> 867.4776, found 868.4849 (M+H)<sup>+</sup>.

25. Fmoc-hArg(Boc)<sub>2</sub>-N-Me-Cha-OH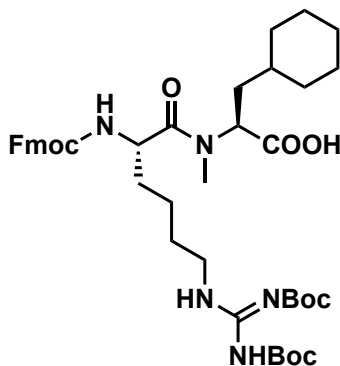

This reaction was adapted from a literature procedure.<sup>[3]</sup> A solution of **24** (0.28 g, 0.32 mmol) was dissolved in MeOH (25 mL) and 10% Pd/C (20 mg) was added to it. The suspension was stirred under H<sub>2</sub> gas overnight, filtered through a pad of celite and concentrated *in vacuo* to give a white powder. The product was purified by flash chromatography (silica gel, 2% MeOH in EtOAc), yielding **25** as a white powder (0.20 g, 71%). (*R*<sub>f</sub> = 0.31 on SiO<sub>2</sub>, 2% MeOH in EtOAc); [ $\alpha$ ]<sub>D</sub><sup>26</sup> -5.20 (c 0.75 CH<sub>2</sub>Cl<sub>2</sub>); IR (CH<sub>2</sub>Cl<sub>2</sub> cast) 3332, 3283, 3138, 3057, 2979, 2928, 2853, 1721, 1640, 1577, 1158 cm<sup>-1</sup>; <sup>1</sup>H (CDCl<sub>3</sub>, 400 MHz)  $\delta$  7.75 (d, *J* = 7.6 Hz, 2H, Fmoc Ar-H), 7.62 (t, *J* = 8.1 Hz, 2H, Fmoc Ar-H), 7.38 (dt, *J* = 7.3, 4.8 Hz, 2H, Fmoc Ar-H), 7.29 (m, 2H, Fmoc Ar-H), 5.39 (dd, *J* = 10.6, 4.7 Hz, 1H, Lys-CH $\alpha$ ), 4.74 (d, *J* = 5.4 Hz, 1H, Cha-CH $\alpha$ ), 4.32 (app. d, *J* = 7.1 Hz, 2H, Fmoc-CH<sub>2</sub>), 4.20 (t, *J* = 7.4 Hz, 1H, Fmoc-CH), 3.90 (t, *J* = 6.0 Hz, Lys-CH<sub>2</sub> $\epsilon$ ), 2.92 (s, 3H, N-CH<sub>3</sub>), 2.06 – 1.94 (m, 2H, Lys-CH<sub>2</sub> $\beta$ ), 1.74 – 1.66 (m, 6H, Cha-CH<sub>2</sub>), 1.74 – 1.66 (m, 2H, Lys-CH<sub>2</sub> $\delta$ ), 1.50 (s, 9H, Boc-(CH<sub>3</sub>)<sub>3</sub>), 1.49 (s, 9H, Boc-(CH<sub>3</sub>)<sub>3</sub>), 1.37 (m, 2H, Lys-CH<sub>2</sub> $\gamma$ ), 1.33 – 1.06 (m, 4H, Cha-CH<sub>2</sub>), 1.33 – 1.06 (m, 1H, Cha-CH), 1.04 – 0.81 (m, 2H, Cha-CH<sub>2</sub> $\beta$ ); <sup>13</sup>C (CDCl<sub>3</sub>, 100 MHz)  $\delta$  168.0, 165.9, 152.9, 126.6, 124.9, 119.5, 59.5, 55.4, 46.8, 41.0, 35.2, 33.7, 33.5, 32.6, 28.2, 27.9, 27.7, 25.9, 25.7, 25.5, 22.7; HRMS (ESI) Calculated for C<sub>42</sub>H<sub>60</sub>N<sub>5</sub>O<sub>9</sub> 777.4313, found 778.4376 (M+H)<sup>+</sup>.

**2. Experimental procedures for the synthesis of Fmoc-hArg(diBoc)-N-Me-Leu-OH****26. Fmoc-Lys(Boc)-N-Me-Leu-OBn**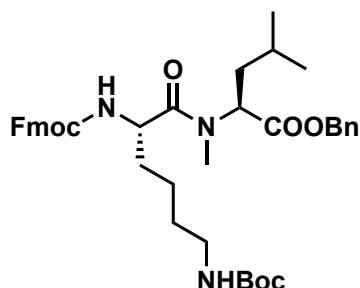

This reaction was adapted from a literature procedure.<sup>[3]</sup> Fmoc-N-Me-Leu-Bn (0.60 g, 1.63 mmol) was dissolved in a 1:1 solution of DEA:DCM (2 mL) and stirred at room temperature for 1 h. The reaction mixture was concentrated under reduced pressure affording a white powder. The free amine was used as the crude for the next step. Fmoc-L-Lys(Boc)-OH (1.71 g, 3.65 mmol), PYBOP (1.39 g, 2.67 mmol), HOBt (0.36 g, 2.67 mmol) and DIPEA (3.5 mL, 15.55 mmol) were dissolved in DMF (20 mL) and allowed to pre-activate for 10 min. The free amine was dissolved in dry CH<sub>2</sub>Cl<sub>2</sub> (30 mL) and DIPEA (0.47 mL, 2.67 mmol) was added to it, where the solution was then added to the previous step. The reaction was stirred at room temperature for 22 h. Subsequently, the reaction was washed with saturated NaHCO<sub>3</sub> (50 mL) and EtOAc was added to dissolve the resulting precipitate (50 mL). The organic layer was washed with 10% citric acid (50 mL), cold H<sub>2</sub>O (50 mL) and brine (50 mL), then dried over Na<sub>2</sub>SO<sub>4</sub> and concentrated under reduced pressure to give a pale yellow oil. The product was purified by flash chromatography (silica gel, 10% EtOAc in CH<sub>2</sub>Cl<sub>2</sub>), yielding **26** as a white powder (0.39 g, 65%). (R<sub>f</sub> = 0.23 on SiO<sub>2</sub>, 10% EtOAc in CH<sub>2</sub>Cl<sub>2</sub>); [α]<sub>D</sub><sup>26</sup> -17.03 (c 0.91 CH<sub>2</sub>Cl<sub>2</sub>); IR (CH<sub>2</sub>Cl<sub>2</sub> cast) 3321, 3065, 3038, 2956, 2869, 1713, 1645, 1511, 1248, 1172 cm<sup>-1</sup>; <sup>1</sup>H (CDCl<sub>3</sub>, 400 MHz) δ 7.76 (d, J = 7.5 Hz, 2H, Fmoc Ar-H), 7.59 (d, J = 7.4 Hz, 2H, Fmoc Ar-H), 7.45 – 7.35 (m, 2H, Fmoc Ar-H), 7.45 – 7.35 (m, 5H, Ar-H), 5.36 (dd, J = 10.7, 5.0 Hz, 1H, Lys-CH<sub>α</sub>), 5.14 (t, J = 10.0 Hz, 2H, Lys-CH<sub>2ε</sub>), 4.65 (m, 1H, Leu-CH<sub>α</sub>), 4.36 (d, J = 7.2 Hz, 2H, Fmoc-CH<sub>2</sub>), 4.21 (t, J = 6.9 Hz, 1H, Fmoc-CH), 3.07 (m, 2H, Ar-CH<sub>2</sub>), 2.93 (s, 3H, N-CH<sub>3</sub>), 1.89 – 1.63 (m, 2H, Leu-CH<sub>2β</sub>), 1.60 – 1.49 (m, 2H, Lys-CH<sub>2β</sub>), 1.49 – 1.46 (m, 1H, Leu-CH<sub>γ</sub>), 1.43 (s, 9H, Boc-(CH<sub>3</sub>)<sub>3</sub>), 1.41 – 1.36 (m, 2H, Lys-CH<sub>2δ</sub>), 1.30 – 1.26 (m, 2H, Lys-CH<sub>2γ</sub>), 0.94 (d, J = 6.7 Hz, 3H, Leu-CH<sub>3</sub>), 0.90 (d, J = 6.5 Hz, 3H, Leu-CH<sub>3</sub>); <sup>13</sup>C (CDCl<sub>3</sub>, 100 MHz) δ 171.0, 155.7, 143.4, 140.9, 135.0, 128.3, 128.1, 127.9, 127.3, 126.7, 124.8, 119.6, 66.7, 54.4, 50.5, 46.8, 36.4, 32.0, 28.1, 24.5, 22.8, 21.7, 21.0; HRMS (ESI) Calculated for C<sub>40</sub>H<sub>51</sub>N<sub>3</sub>O<sub>7</sub> 685.3727, found 683.3791(M+H)<sup>+</sup>.

**27. Fmoc-hArg(Boc)<sub>2</sub>-N-Me-Leu-OBn**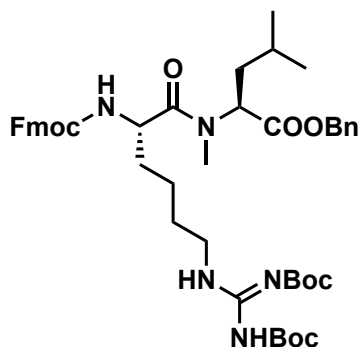

This reaction was adapted from a literature procedure.<sup>[3]</sup> Dipeptide **26** (0.39 g, 0.57 mmol) was dissolved in dry CH<sub>2</sub>Cl<sub>2</sub> (20 mL) and TFA (10 mL) was added to the solution. The reaction was stirred at room temperature for 1.5 h and concentrated *in vacuo* giving a sticky yellow foam. The foam was resuspended in dry CH<sub>2</sub>Cl<sub>2</sub> (20 mL) with the addition of N,N'-Di-Boc-N"-guanidine triflate (0.254 g, 0.65 mmol) and Et<sub>3</sub>N (0.18 mL, 1.3 mmol) and stirred at room temperature for 1.5 h. The reaction was washed with 2M NaHSO<sub>4</sub> (20 mL), 10% NaHCO<sub>3</sub> (20 mL) and brine (20 mL), then dried over Na<sub>2</sub>SO<sub>4</sub> and concentrated *in vacuo* to give an off-white foam. The product was purified by flash chromatography (silica gel, 25% EtOAc in hexane), yielding **27** as a white powder (0.29 g, 74%). (R<sub>f</sub> = 0.26 on SiO<sub>2</sub>, 25% EtOAc in hexane); [α]<sub>D</sub><sup>26</sup> -12.00 (c 0.84 CH<sub>2</sub>Cl<sub>2</sub>); IR (CH<sub>2</sub>Cl<sub>2</sub> cast) 3333, 3065, 3038, 2957, 2869, 1720, 1640, 1575, 1156, 1134 cm<sup>-1</sup>; <sup>1</sup>H (CDCl<sub>3</sub>, 400 MHz) δ 7.76 (d, J = 7.5 Hz, 2H, Fmoc Ar-H), 7.59 (d, J = 7.4 Hz, 2H, Fmoc Ar-H), 7.43 – 7.37 (m, 2H, Fmoc Ar-H), 7.44 – 7.37 (m, 5H, Ar-H), 5.36 (dd, J = 10.7, 4.8 Hz, 1H, Leu-CH<sub>α</sub>), 5.13 (t, J = 12.2 Hz, 2H, Lys-CH<sub>2</sub>ε), 4.64 (m, 1H, Lys-CH<sub>α</sub>), 4.36 (d, J = 7.2 Hz, 2H, Fmoc-CH<sub>2</sub>), 4.21 (t, J = 6.9 Hz, 1H, Fmoc-CH), 3.35 (m, 2H, Ar-CH<sub>2</sub>), 2.93 (s, 3H, N-CH<sub>3</sub>), 1.85 – 1.74 (m, 2H, Leu-CH<sub>2</sub>β), 1.72– 1.58 (m, 2H, Lys-CH<sub>2</sub>β), 1.57 – 1.52 (m, 1H, Leu-CH<sub>γ</sub>), 1.50 (s, 9H, Boc-(CH<sub>3</sub>)<sub>3</sub>), 1.48 (s, 9H, Boc-(CH<sub>3</sub>)<sub>3</sub>), 1.43 – 1.33 (m, 2H, Lys-CH<sub>2</sub>δ), 1.31 – 1.16 (m, 2H, Lys-CH<sub>2</sub>γ), 0.93 (d, J = 6.7 Hz, 3H, Leu-CH<sub>3</sub>), 0.90 (d, J = 6.5 Hz, 3H, Leu-CH<sub>3</sub>); <sup>13</sup>C (CDCl<sub>3</sub>, 100 MHz) δ 170.9, 155.7, 143.5, 140.1, 135.0, 128.3, 128.1, 128.0, 127.3, 126.7, 124.8, 119.5, 66.7, 54.4, 50.5, 46.8, 36.4, 32.1, 28.0, 27.7, 24.5, 22.8, 22.0, 21.0; HRMS (ESI) Calculated for C<sub>46</sub>H<sub>61</sub>N<sub>5</sub>O<sub>9</sub> 827.4469, found 828.4535 (M+H)<sup>+</sup>.

## 28. Fmoc-hArg(Boc)<sub>2</sub>-N-Me-Leu-OH

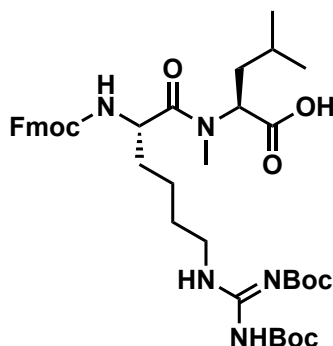

This reaction was adapted from a literature procedure.<sup>[3]</sup> A solution of **27** (0.29 g, 0.35 mmol) was dissolved in MeOH (25 mL) and 10% Pd/C (20 mg) was added to it. The suspension was stirred under H<sub>2</sub> gas overnight, filtered through a pad of celite and concentrated *in vacuo* to give a clear oil. The product was purified by flash chromatography (silica gel, 25% EtOAc in hexane), yielding **28** as a white powder (0.18 g, 62%). (R<sub>f</sub> = 0.72 on SiO<sub>2</sub>, 25% EtOAc in hexane); [α]<sub>D</sub><sup>26</sup> -6.00 (c 0.26 CH<sub>2</sub>Cl<sub>2</sub>); IR (CH<sub>2</sub>Cl<sub>2</sub> cast) 3325, 3287, 3065, 2957, 2924, 2870, 1721, 1641, 1415, 1368, 1137 cm<sup>-1</sup>; <sup>1</sup>H (CDCl<sub>3</sub>, 400 MHz) δ 8.36 (bs, 1H, COOH), 7.76 (d, J = 7.7 Hz, 2H, Fmoc Ar-H), 7.60 (dd, J = 13.8, 7.6 Hz, 2H, Fmoc Ar-H), 7.41 – 7.34 (m, 2H, Fmoc Ar-H), 7.34 – 7.28 (m, 2H, Fmoc Ar-H), 5.35 (dd, J = 10.8, 4.8 Hz, 1H, Leu-CH<sub>α</sub>), 4.75 (dd, J = 13.9, 6.1 Hz, 2H, Lys-CH<sub>2</sub>α), 4.32 (d, J = 7.6 Hz, 2H, Fmoc-CH<sub>2</sub>), 4.19 (t, J = 7.5 Hz, 1H, Fmoc-CH), 3.40 (m, 2H, Leu-CH<sub>2</sub>ε), 3.00 (s, 3H, N-CH<sub>3</sub>), 1.89 – 1.74 (m, 2H, Leu-CH<sub>2</sub>β), 1.73 – 1.58 (m, 2H, Lys-CH<sub>2</sub>β), 1.54 – 1.52 (m, 1H, Leu-CH<sub>γ</sub>), 1.50 (s, 9H, Boc-(CH<sub>3</sub>)<sub>3</sub>), 1.49 (s, 9H, Boc-(CH<sub>3</sub>)<sub>3</sub>), 1.46 – 1.35 (m, 2H, Lys-CH<sub>2</sub>δ), 1.31 – 1.24 (m, 2H, Lys-CH<sub>2</sub>γ), 0.97 (d, J = 6.7 Hz, 3H, Leu-CH<sub>3</sub>), 0.89 (d, J = 6.5 Hz, 3H, Leu-CH<sub>3</sub>); <sup>13</sup>C (CDCl<sub>3</sub>, 100 MHz) δ 171.0, 155.7, 128.3, 128.2, 127.9, 127.3, 126.7, 124.8, 119.5, 54.4, 50.5, 46.8, 36.4, 32.2, 28.1, 27.7, 24.5, 22.8, 21.9, 21.0; HRMS (ESI) Calculated for C<sub>39</sub>H<sub>55</sub>N<sub>5</sub>O<sub>9</sub> 737.4000, found 738.4062 (M+H)<sup>+</sup>.



### 3. *In vitro* neprilysin (NEP) stability

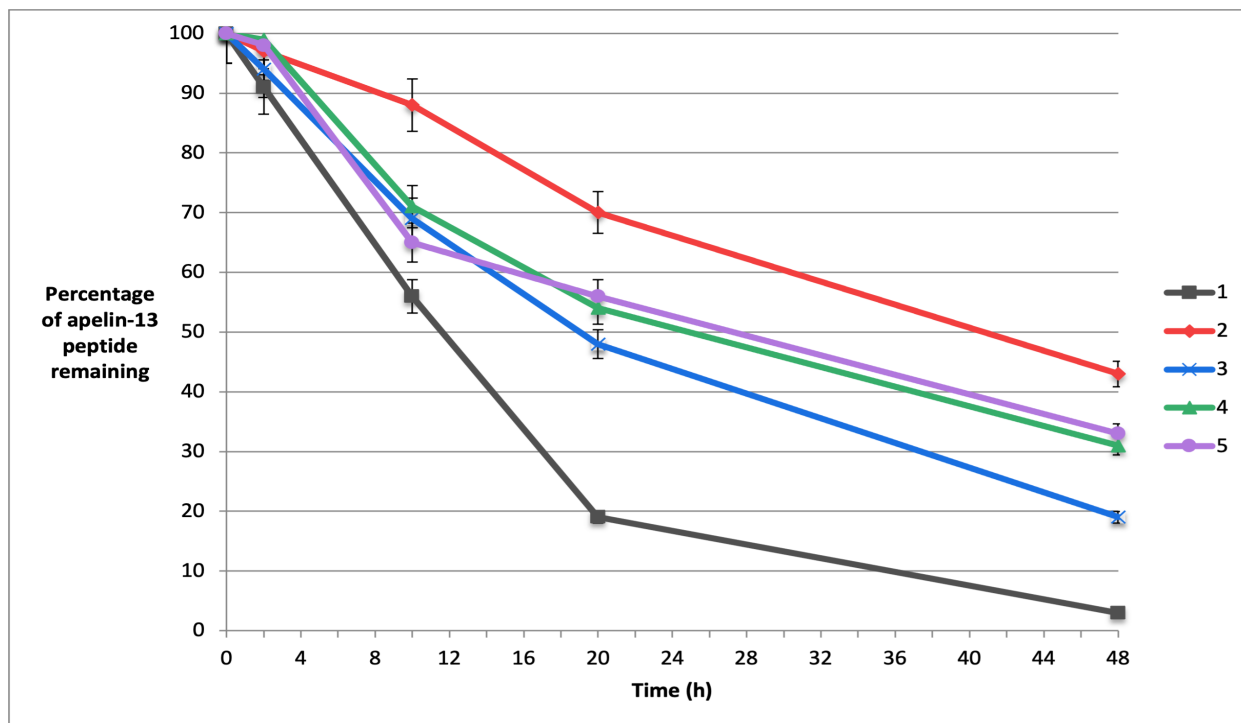

**Figure S1.** *In vitro* rhNEP degradation trends for pyr-1-apelin-13 analogues, comparing (1) ACE2-resistant, (2) N-Me-Leu13A2, and (3-5) novel Arg/Leu substituted analogues. Experiments done in triplicate.

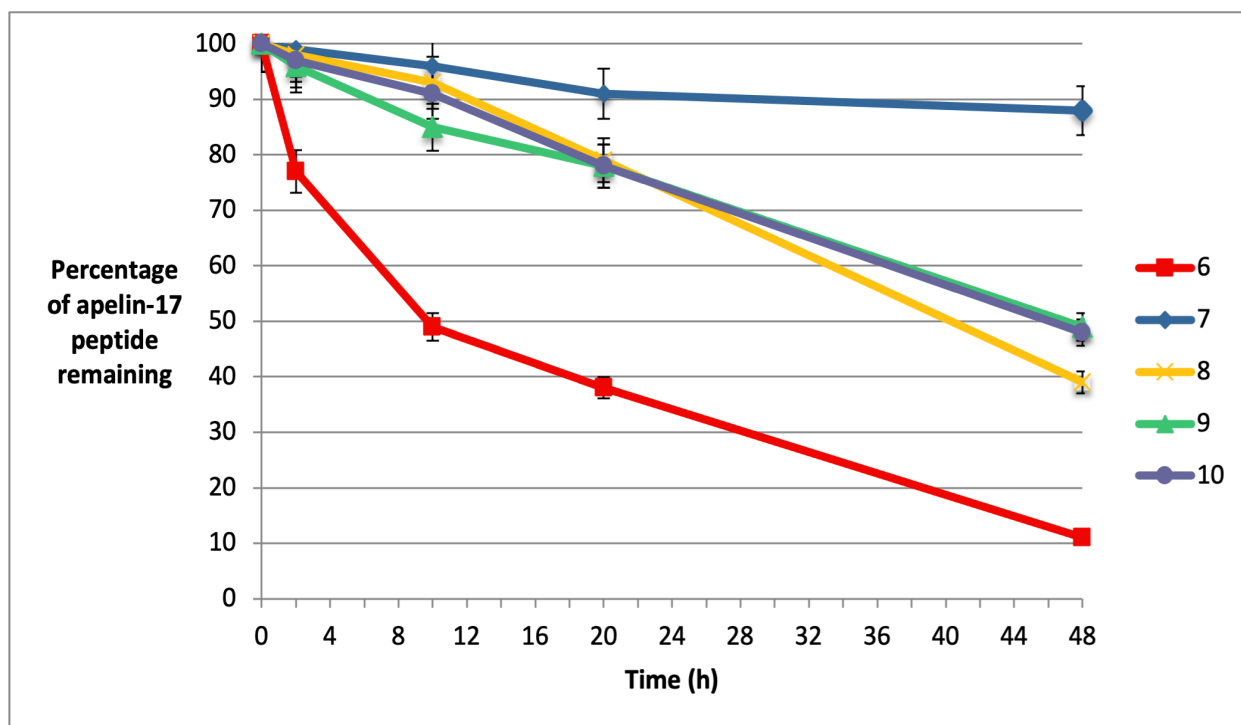

**Figure S2.** *In vitro* rhNEP degradation trends for apelin-17 analogues, comparing (6) ACE2-resistant, (7) N-Me-Leu17A2, and (8-10) novel Arg/Leu substituted analogs. Experiments done in triplicate.

#### 4. *In vitro* human plasma stability of novel 13-mers

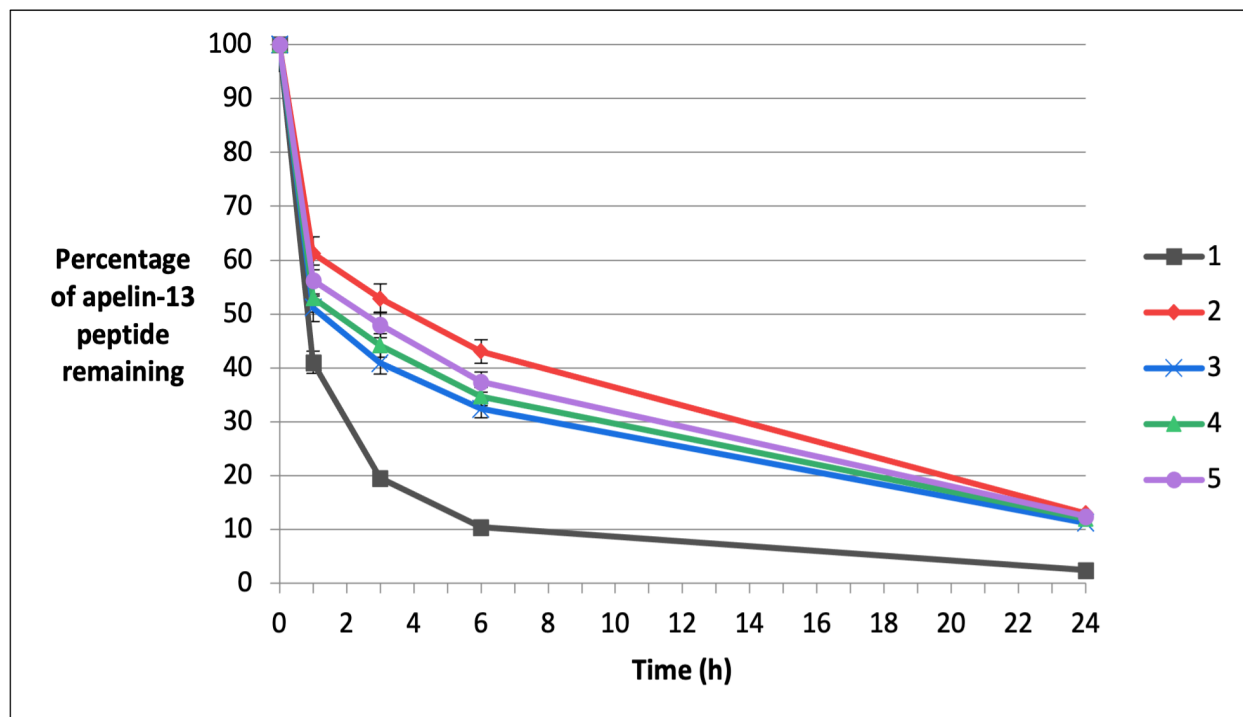

**Figure S3.** *In vitro* human plasma degradation trends for pyr-1-apelin-13 analogues, comparing (1) ACE2-resistant, (2) N-Me-Leu13A2, and (3-5) novel Arg/Leu substituted analogues. Experiments done in triplicate.

**5. *In vitro* mice plasma stability of novel 17-mers**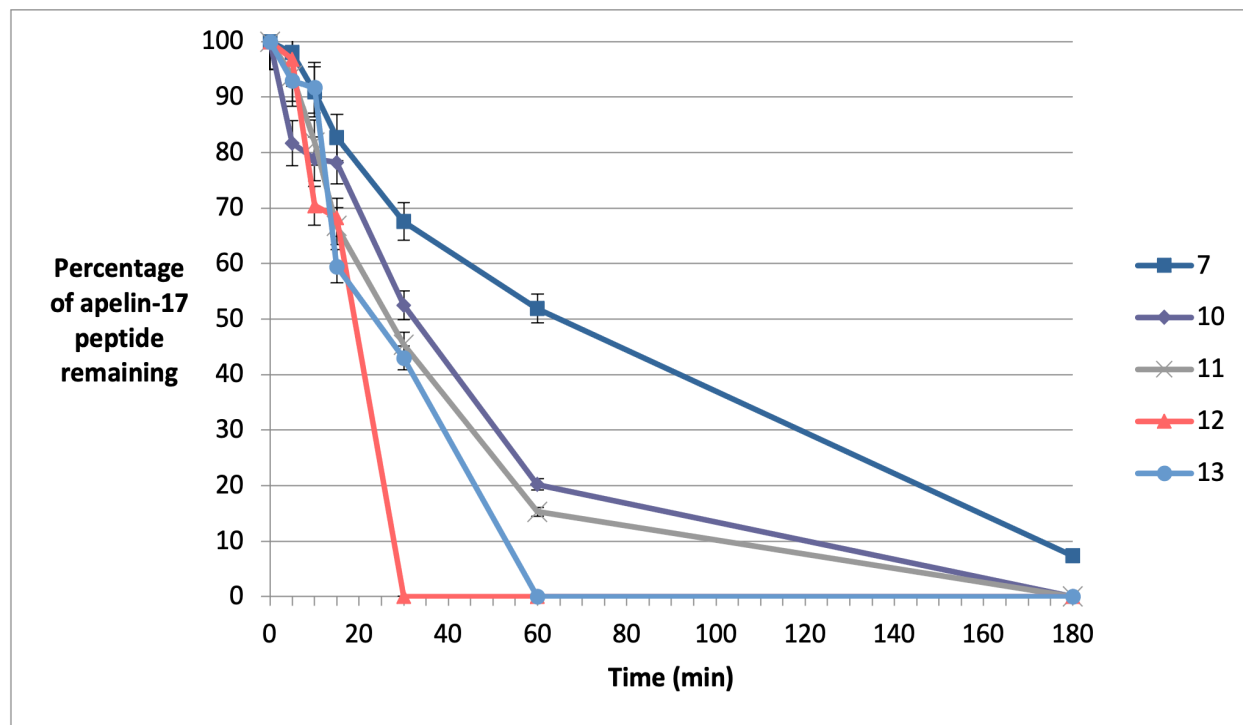

**Figure S4.** *In vitro* murine plasma degradation trends for apelin-17 analogues, comparing (7) NMe-Leu-17A2, and (10, 11-13) novel Arg/Leu substituted analogues. Experiments done in triplicate.

6. Ca<sup>2+</sup>-mobilization: concentration response curves for novel analogues

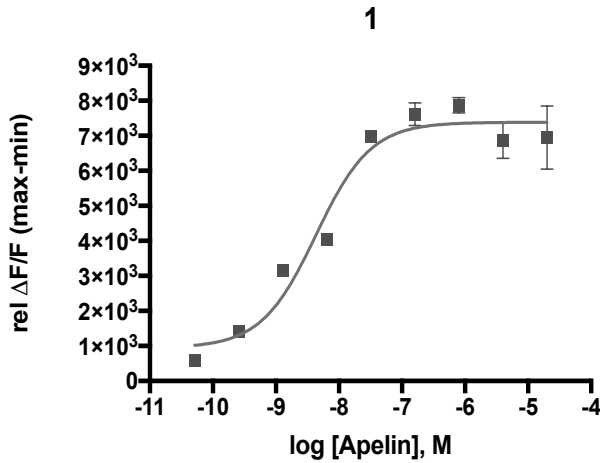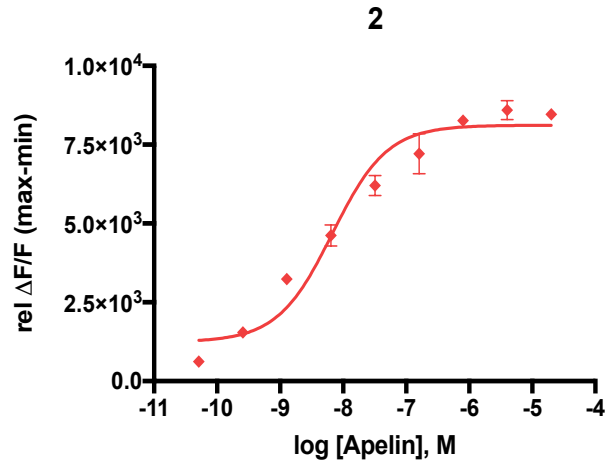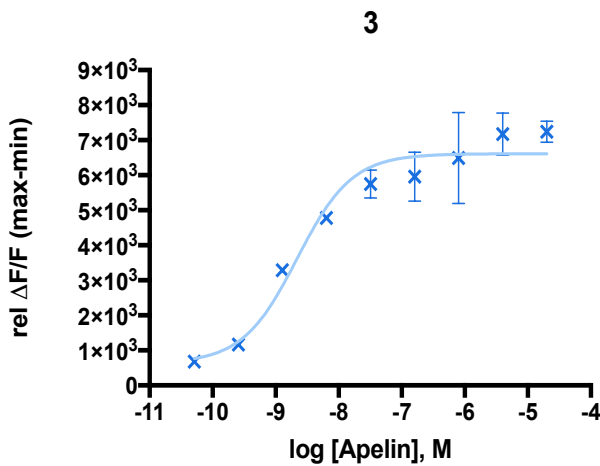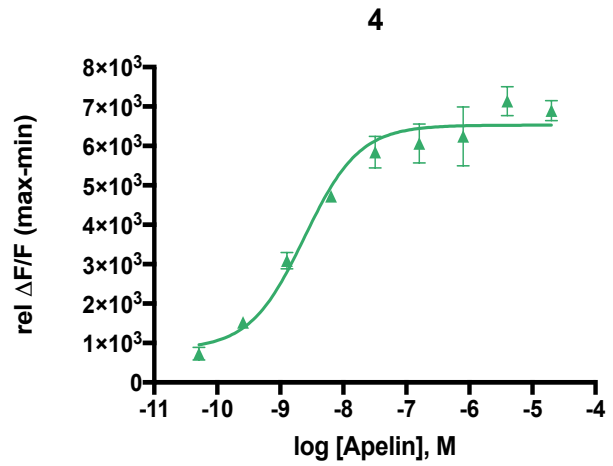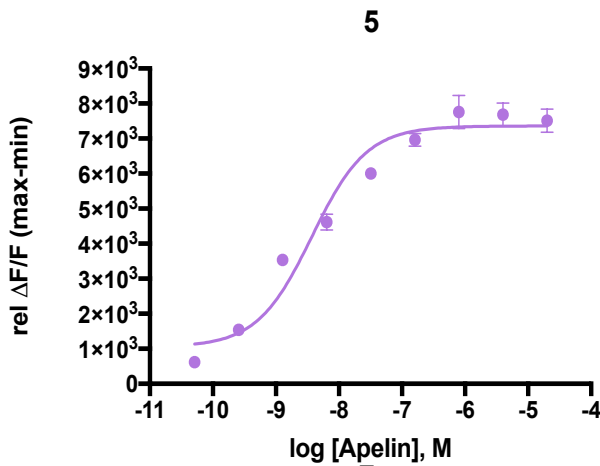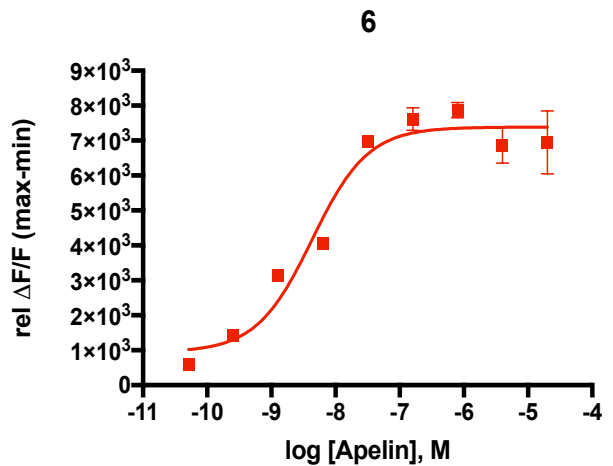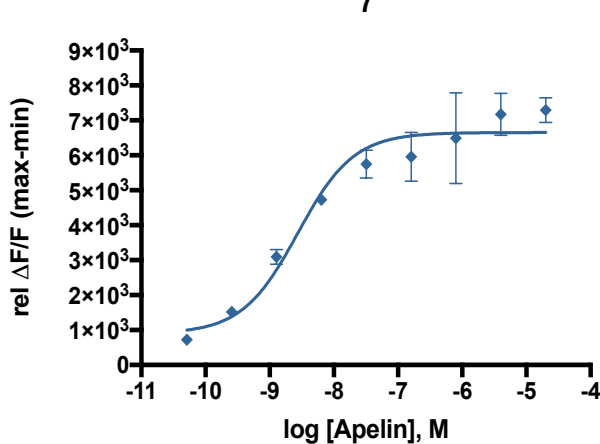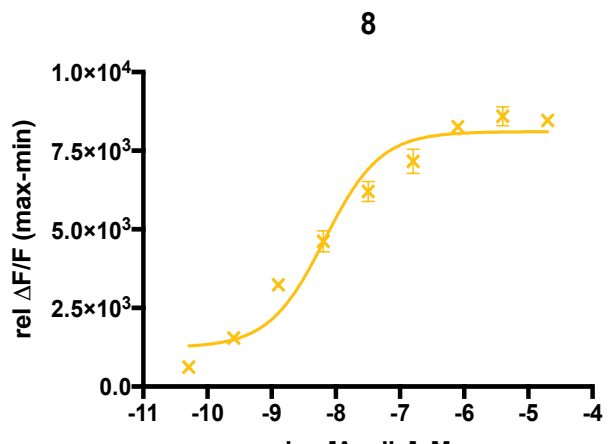

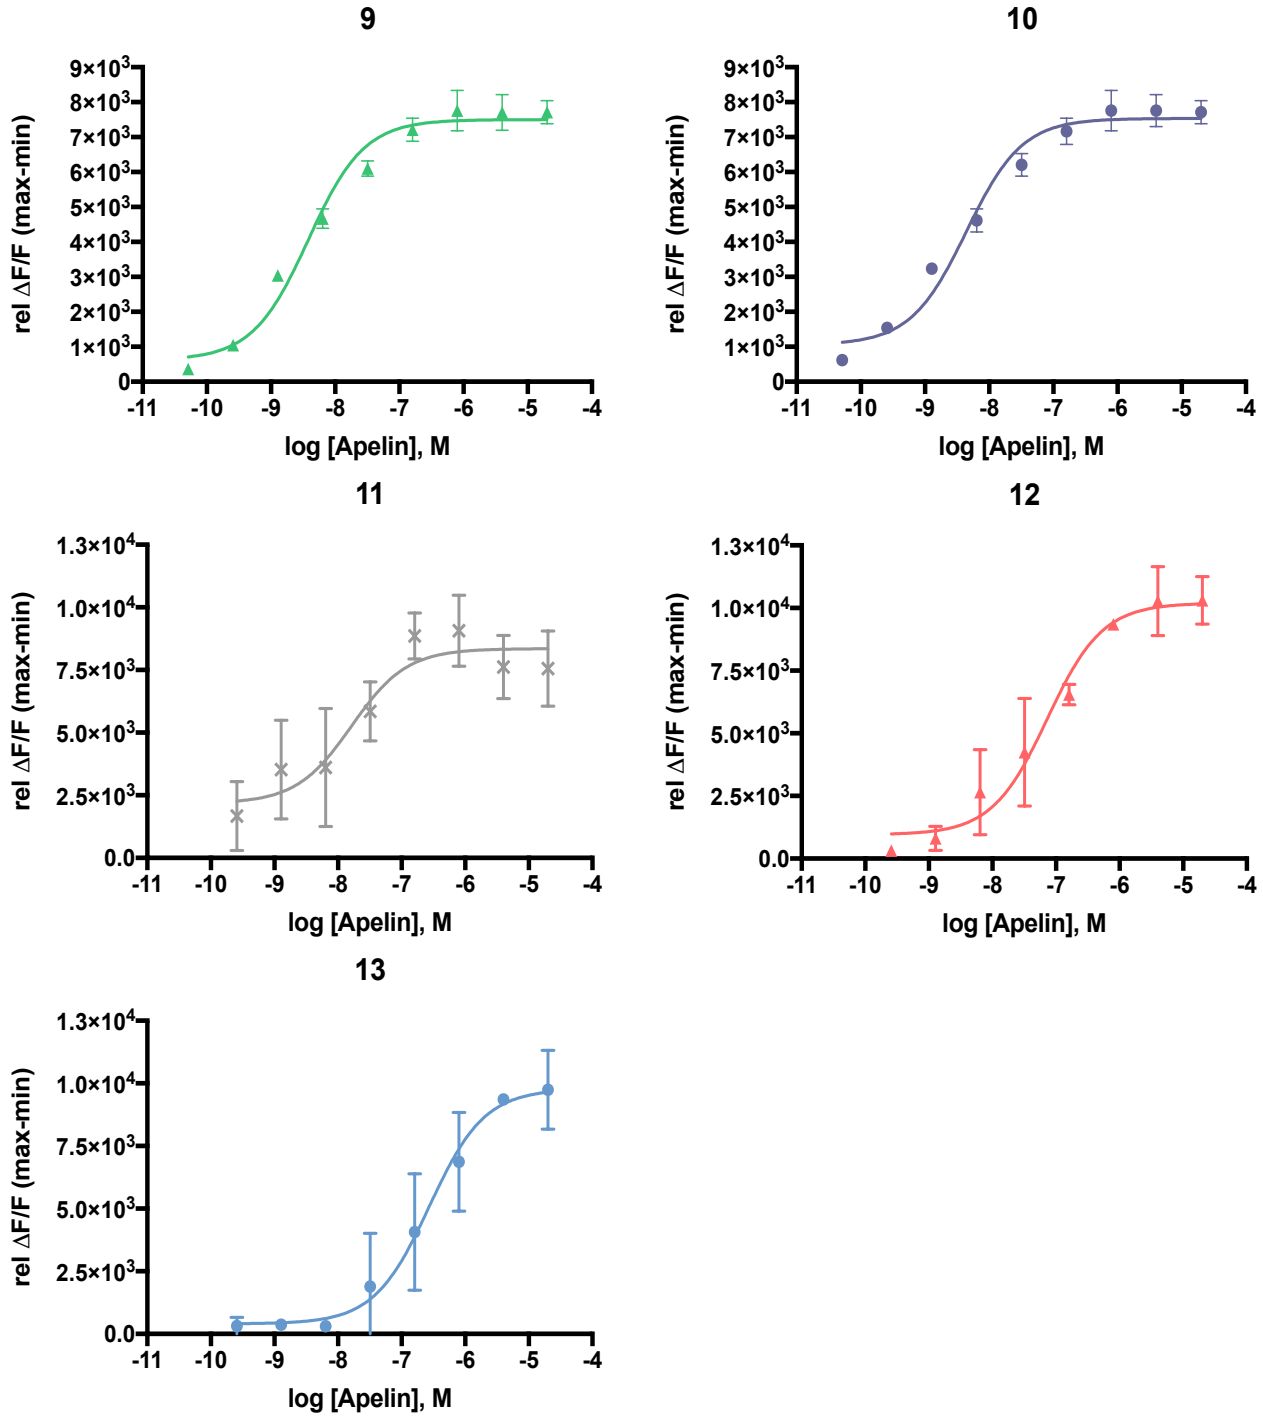

**Figure S5.** Concentration response (fluorescence) curves of ACE2-resistant (1,6), NEP-stabilized (2, 7) and title (3-5 and 8-13) analogues.

## 7. Blood pressure data for novel 13-mers

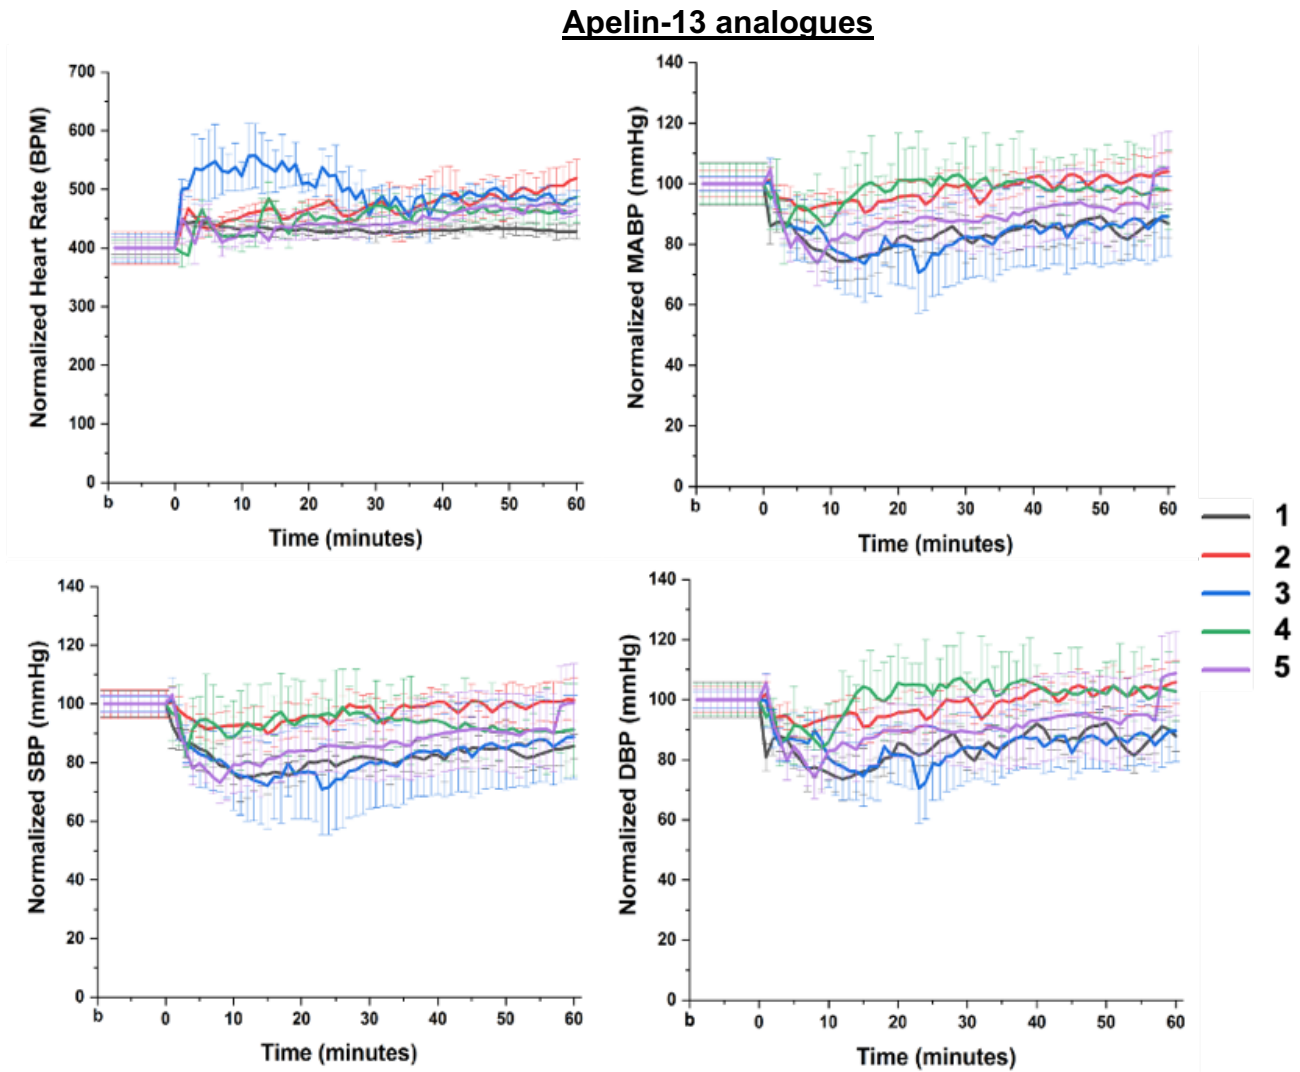

**Figure S6.** *In vivo* heart rate (HR), mean arterial (MABP), systolic (SBP), and diastolic blood pressure (DBP) analyses following injection of apelin analogs **1-5** in anesthetized mice (n=3). Values represent mean  $\pm$  S.E.M.

## 8. LCMS/MS ions for synthesized analogues

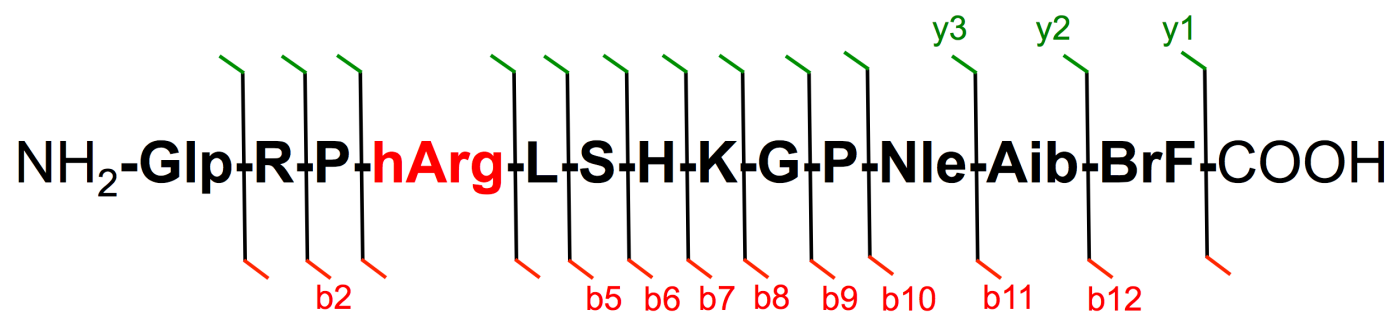

Figure S7. LCMS/MS ion characterization for analogue 3.

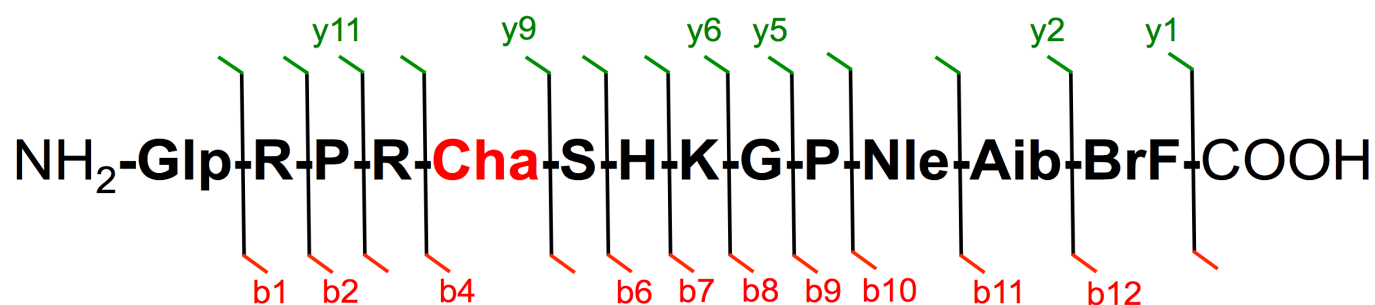

Figure S8. LCMS/MS ion characterization for analogue 4.

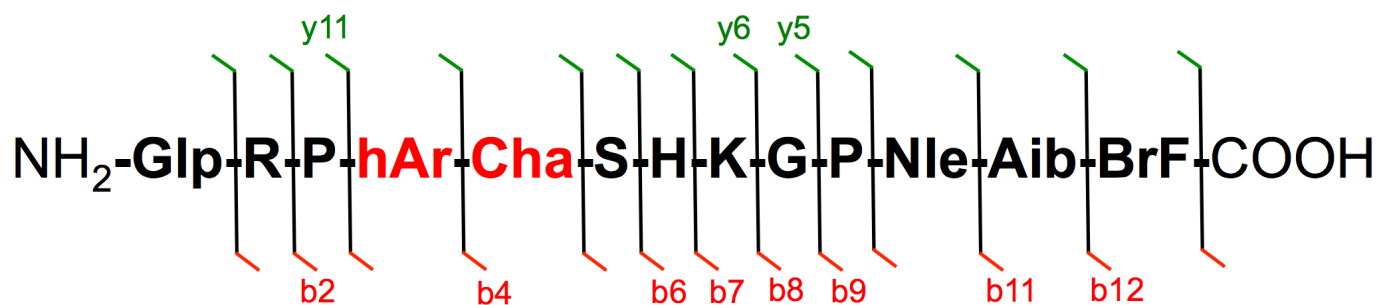

Figure S9. LCMS/MS ion characterization for analogue 5.

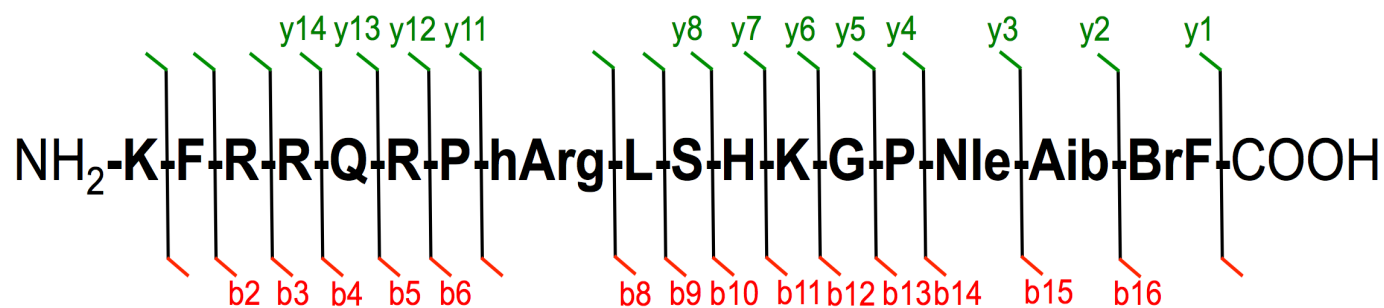

Figure S10. LCMS/MS ion characterization for analogue 8.

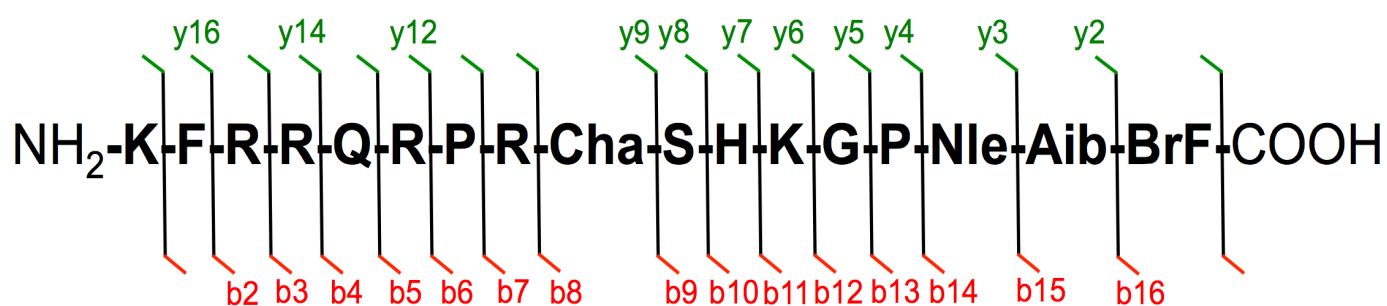

Figure S11. LCMS/MS ion characterization for analogue 9.

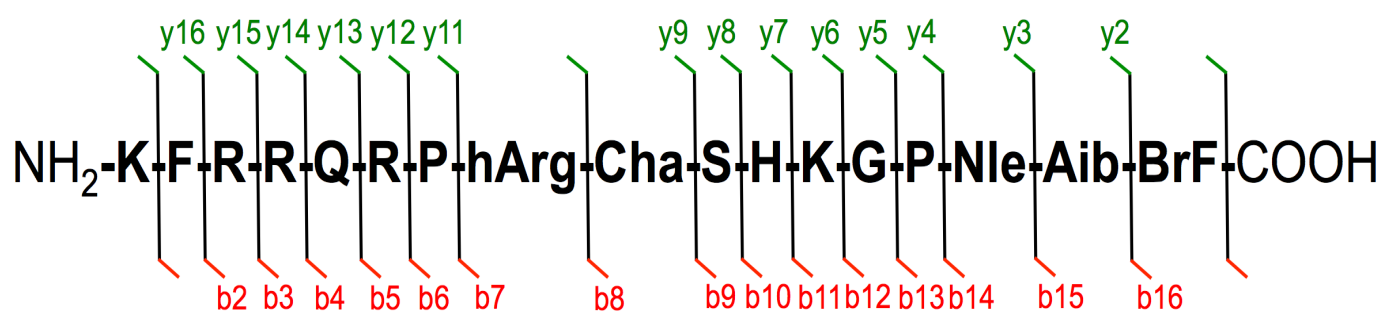

Figure S12. LCMS/MS ion characterization for analogue 10.



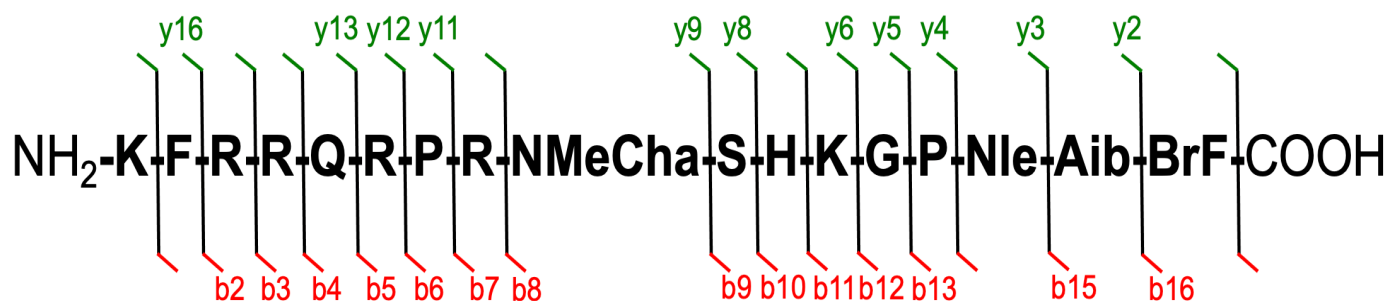

Figure S13. LCMS/MS ion characterization for analogue 11.

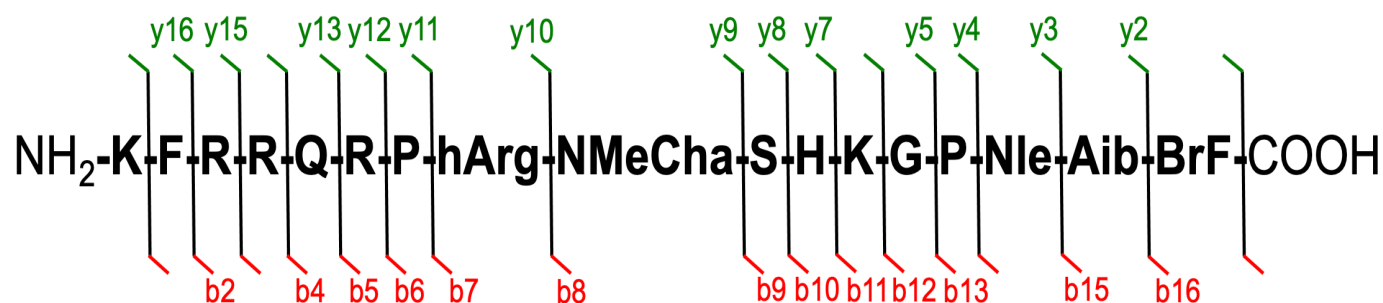

Figure S14. LCMS/MS ion characterization for analogue 12.

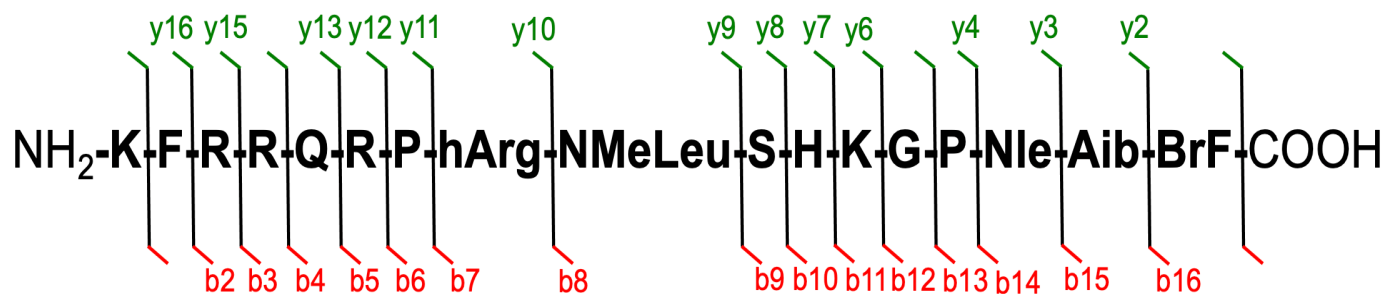

Figure S15. LCMS/MS ion characterization for analogue 13.

### 9. HPLC traces for novel analogues

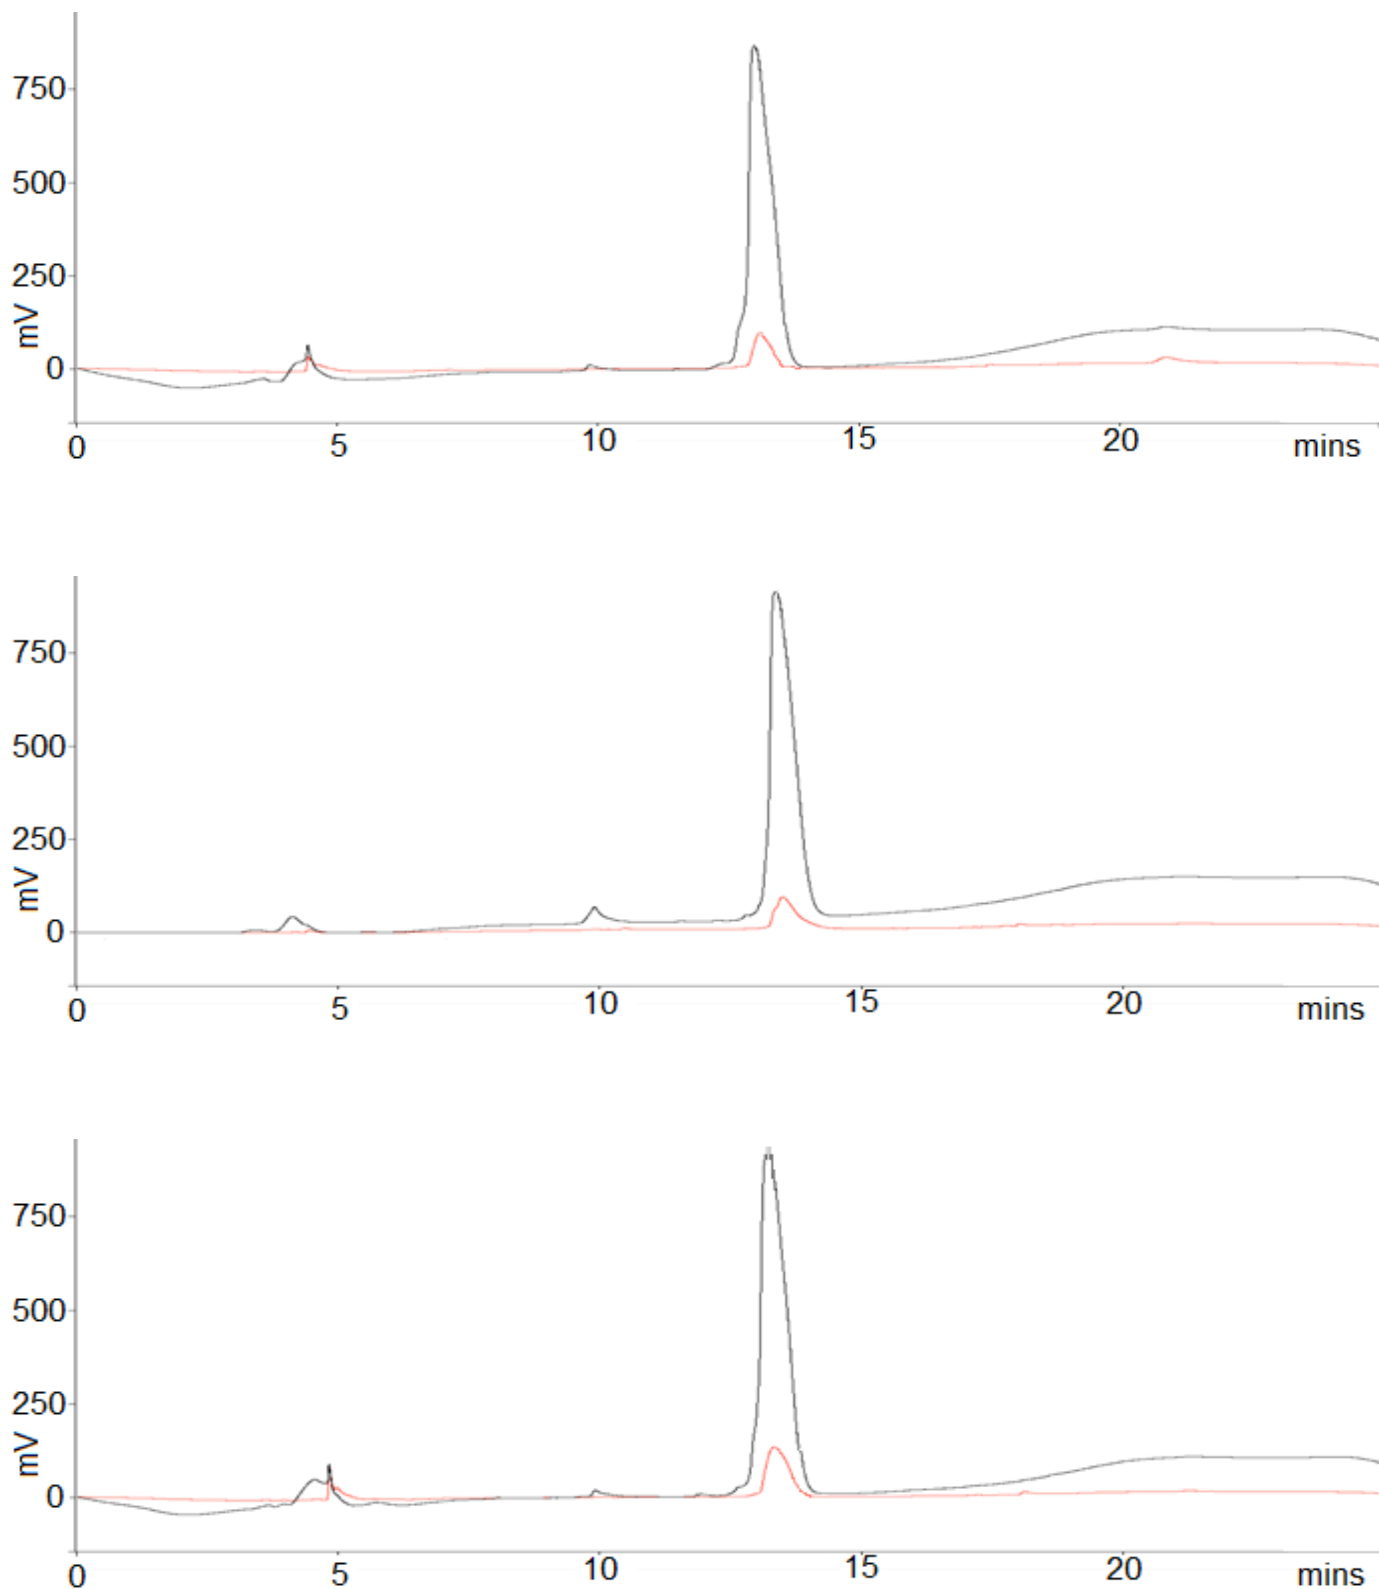

**Figure S16.** Exemplary HPLC trace of analogues 3-5 after HPLC purification (black line = 220 nm, red line = 280 nm). An average purity of >95% was obtained after repeated HPLC runs.

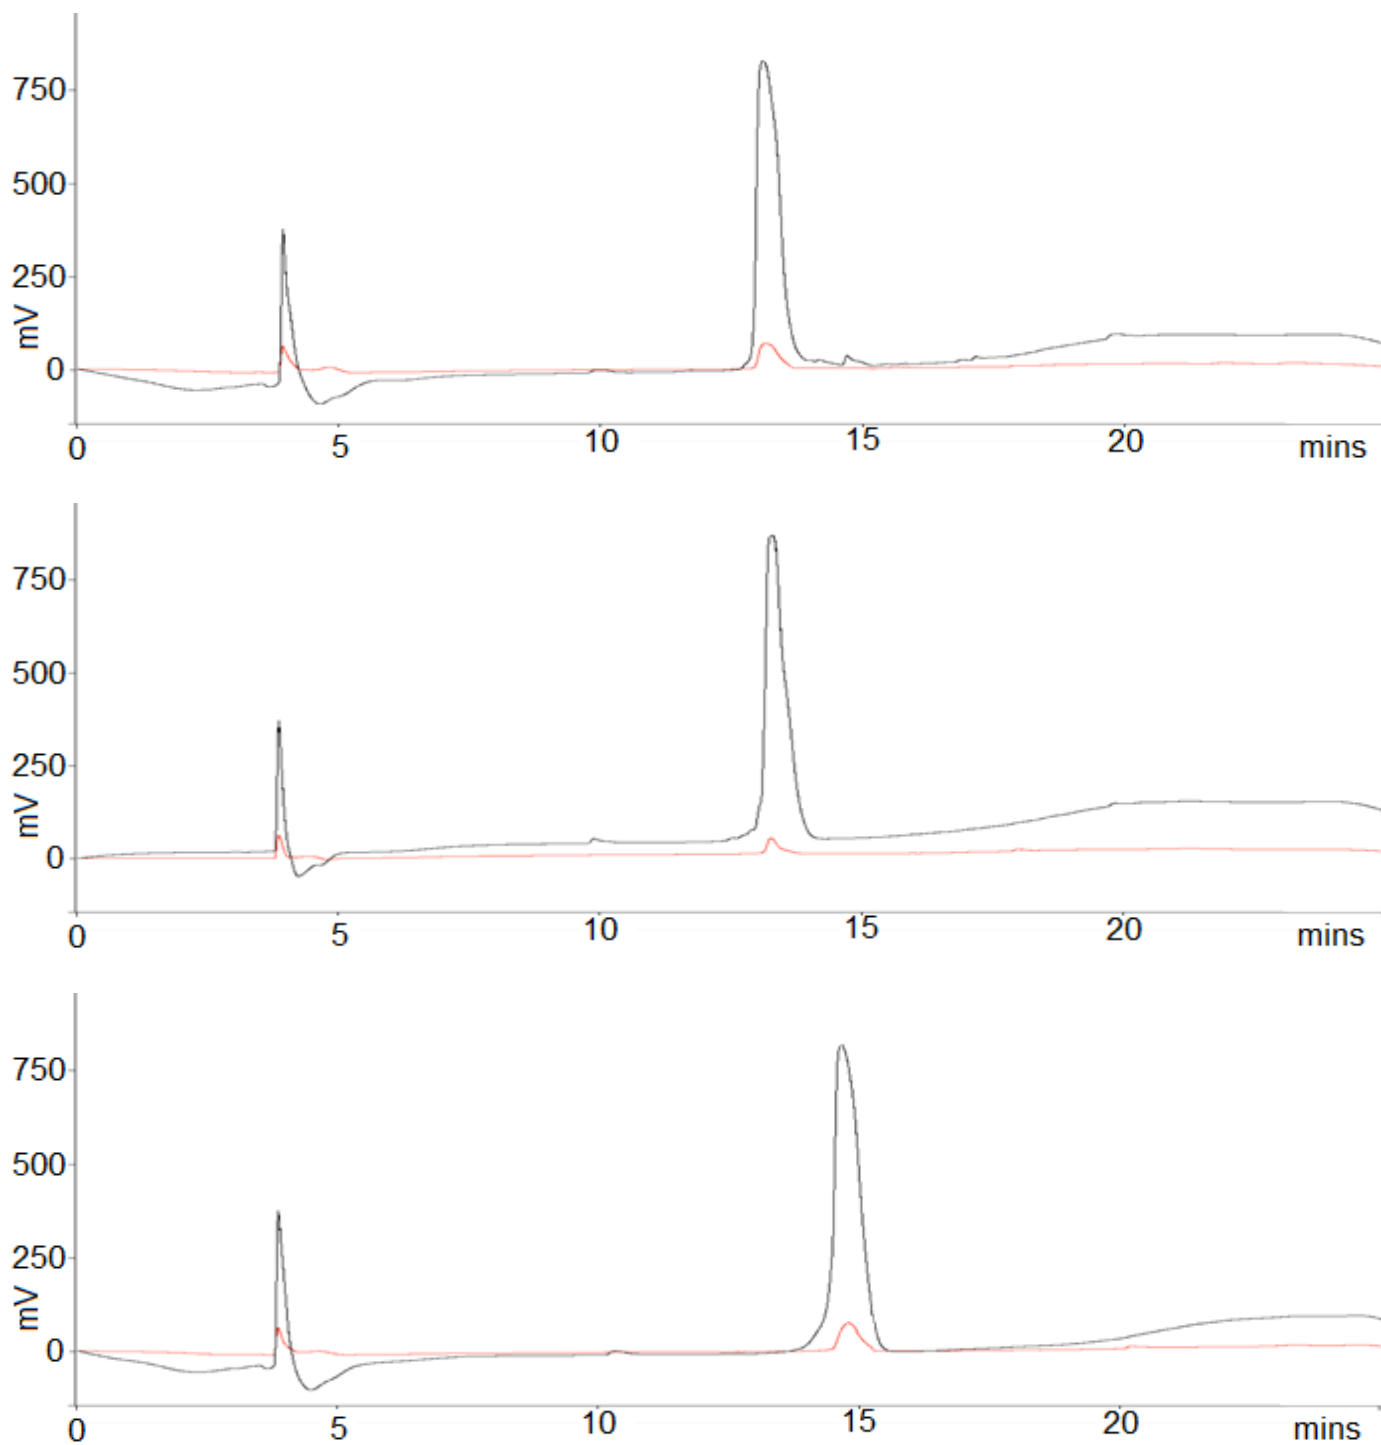

**Figure S17.** Exemplary HPLC trace of analogues **8-10** after HPLC purification (black line = 220 nm, red line = 280 nm). An average purity of >95% was obtained after repeated HPLC runs.

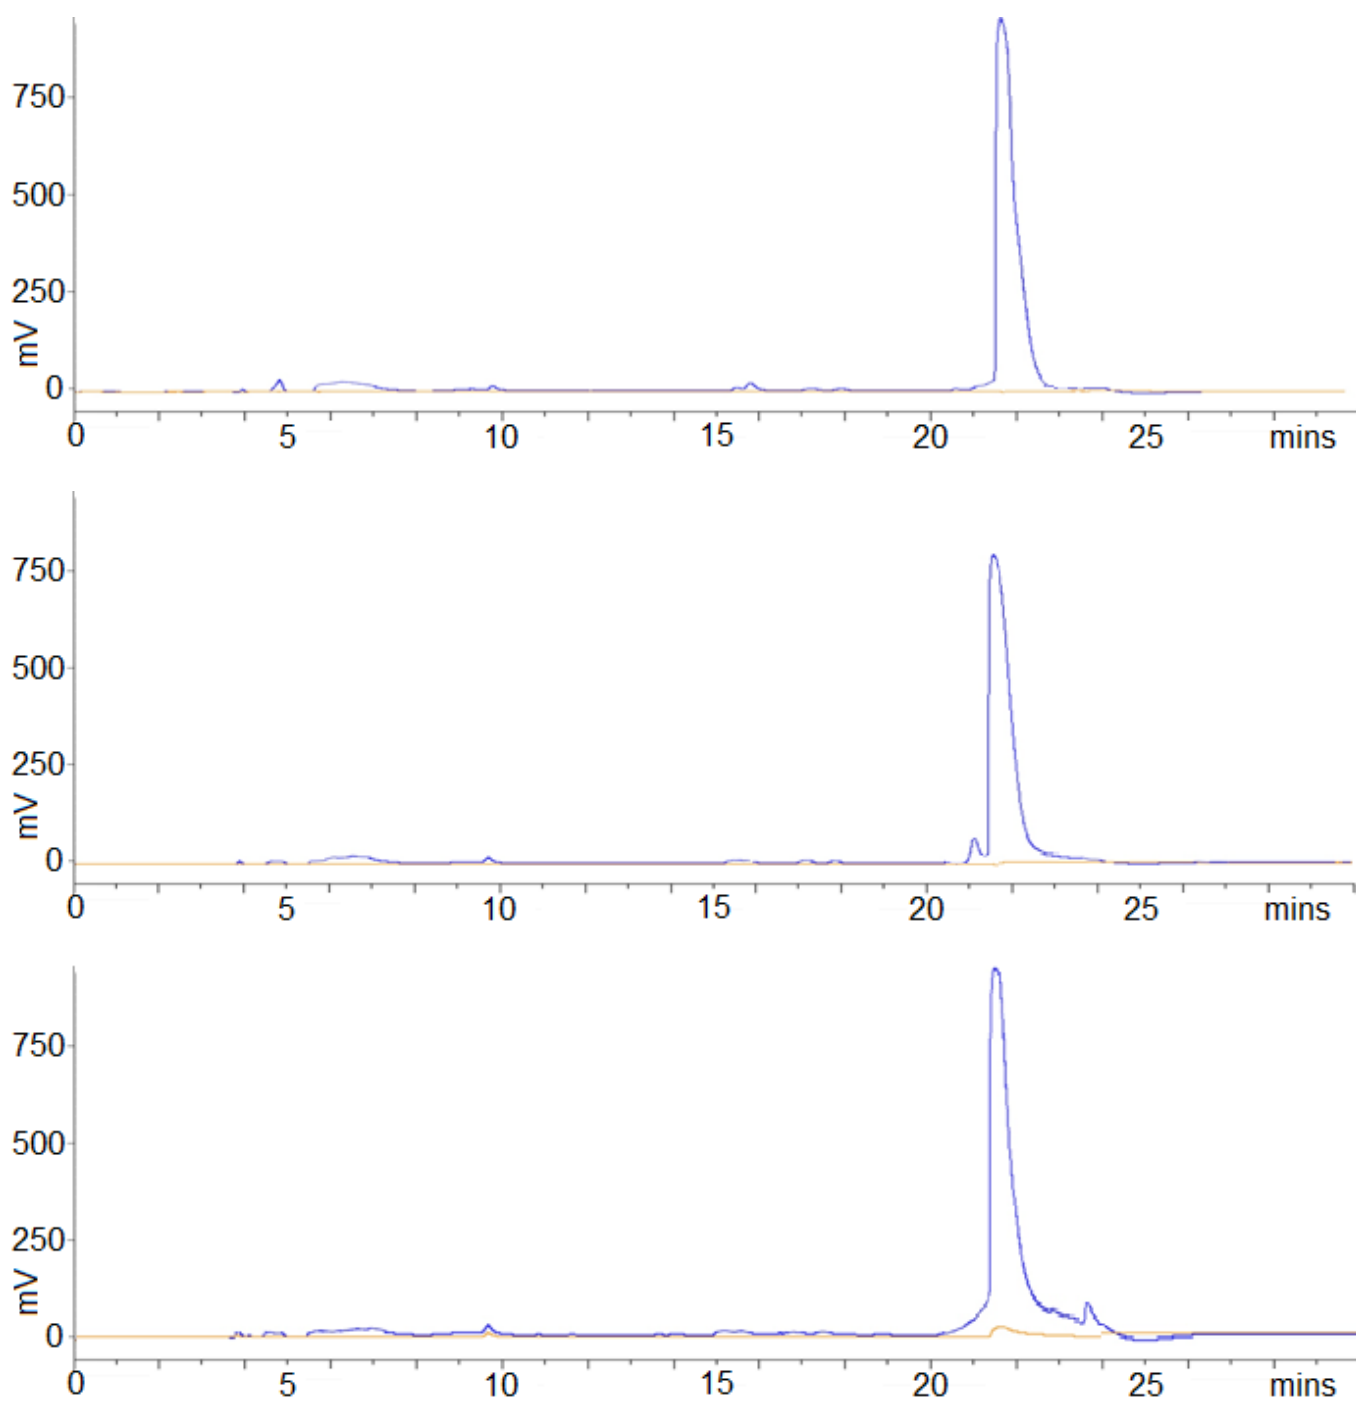

**Figure S18.** Exemplary HPLC trace of analogues **11-13** after HPLC purification (blue line = 220 nm, orange line = 280 nm). An average purity of >95% was obtained after repeated HPLC runs.

## 10. References

---

<sup>1</sup>R.M. Freidinger, J.S. Hinkle, D.S. Perlow, B.H. Arison, Synthesis of 9-fluorenylmethoxycarbonyl-protected N-alkyl amino acids by reduction of oxazolidinones, *J. Org. Chem.* 48 (1983), 77-81.

<sup>2</sup>F.E. Dutton, B.H. Lee, S.S. Johnson, E.M. Coscarelli, P.H. Lee, Restricted conformation analogues of an anthelmintic cyclodepsipeptide, *J. Med. Chem.* 46 (2003), 2057-2073.

<sup>3</sup>S.M.K. McKinnie, W. Wang, C. Fischer, T. McDonald, R.K. Kalin, X. Iturrioz, C. Llorens-Cortes, G.Y. Oudit, J.C. Vederas, Synthetic modification with the "RPRL" region of apelin peptides: impact on cardiovascular activity and stability to neprilysin and plasma degradation, *J. Med. Chem.* 60 (2017), 6408-6427.
